# Supplementary material for: Mechanism and regulation of tensile-induced degradation of flexible perovskite solar cells
Source: Royal Society of Chemistry journal article supplement (doi:10.1039/d4ya00086b), 2024-01-01
Supplement: d4ya00086b2.xlsx [file d4ya00086b2.xlsx]

## Sheet: 1
strain(%)	0	0.5	1	1.5	2	2.5
V(V)	J(mA/cm2)	J	J	J	J	J
1.2	-34.5335	-47.369	-39.7288	-32.3943	-26.9291	-22.2802
1.18685	-31.783	-46.1465	-37.8952	-28.8975	-23.9455	-19.2193
1.17375	-29.9204	-44.0073	-36.0615	-25.9719	-21.4487	-17.1705
1.1606	-27.4013	-40.9512	-33.3111	-23.3132	-18.6927	-14.8635
1.1475	-24.8045	-37.5896	-30.0937	-20.8451	-15.5242	-12.7459
1.13435	-18.429	-33.6167	-27.4327	-18.4931	-13.2315	-10.2672
1.1212	-17.7563	-29.6462	-24.0702	-16.2048	-11.1992	-8.56156
1.1081	-15.7238	-25.9292	-20.6532	-13.9897	-9.37844	-6.9504
1.09495	-13.3654	-22.0846	-17.4504	-11.8444	-7.72267	-5.59413
1.0818	-10.9147	-18.2866	-14.3513	-9.79101	-6.35631	-4.22898
1.0687	-8.49005	-14.6746	-11.5156	-7.85286	-15.5673	-3.26326
1.05555	-6.15552	-11.2842	-8.91484	-6.04642	-47.0634	-2.38006
1.0424	-3.99274	-9.01783	-6.45746	-4.39003	-51.0362	-1.7444
1.0293	-2.32291	-5.49724	-4.32219	-2.88981	-30.8662	-1.15305
1.01615	0.313244	-2.93168	-2.40604	-1.52009	-47.9802	-0.65675
1.00305	2.70584	-0.835831	-0.685475	-0.590431	-45.2297	-0.271987
0.9899	4.18283	1.19309	0.846838	-2.75046	-43.3961	0.0883188
0.97675	5.86061	2.89409	2.0714	1.12555	-42.4793	0.344725
0.96365	7.21567	4.1428	3.20947	2.25599	-39.4232	0.6213
0.9505	8.48179	5.48105	4.03614	3.14836	2.00141	0.841637
0.93735	9.65441	6.68086	5.02875	3.7287	2.44913	1.03968
0.92425	10.6864	7.64688	5.85083	4.50678	2.97874	1.2047
0.9111	11.6081	8.59334	6.55434	5.16964	3.23698	1.37492
0.898	12.4183	9.2834	7.22331	5.76588	3.72014	1.53872
0.88485	13.1157	10.0236	7.81099	6.31994	4.15686	1.68572
0.8717	13.755	10.6773	8.39653	6.8141	4.55934	1.83119
0.8586	14.3424	11.2213	8.90048	7.29329	4.92851	1.97574
0.84545	14.887	11.8111	9.35614	7.73948	5.29188	2.11357
0.8323	15.3705	12.2099	9.77512	8.15969	5.63874	2.27616
0.8192	15.8466	12.7144	10.085	8.53833	5.97949	2.43538
0.80605	16.2607	13.083	10.4719	8.90353	6.28357	2.58482
0.79295	16.6565	13.4577	10.7815	9.23114	6.60293	2.75259
0.7798	17.0562	13.84	11.147	9.58473	6.89539	2.92526
0.76665	17.4278	14.1117	11.4767	9.90348	7.19061	3.10588
0.75355	17.7643	14.4711	11.8074	10.1956	7.48827	3.20947
0.7404	18.0968	14.7394	12.1057	10.4918	7.76637	3.20611
0.72725	18.4015	15.0432	12.3392	10.7488	8.04631	3.4234
0.71415	18.6835	15.291	12.6011	11.0186	8.32624	3.60249
0.701	18.9592	15.5279	12.8672	11.2772	8.60098	3.79777
0.6879	19.2407	15.8163	13.0653	11.5146	8.8635	3.97899
0.67475	19.4735	16.0187	13.3082	11.7243	9.11624	4.18069
0.6616	19.748	16.2723	13.5497	11.9749	9.36378	4.36711
0.6485	19.9955	16.4703	13.7776	12.1983	9.61651	4.54803
0.63535	20.2314	16.6574	14.0151	12.3829	9.84327	4.73262
0.6222	20.4432	16.9171	14.2226	12.6072	10.1	4.92393
0.6091	20.6682	17.0852	14.4488	12.785	10.3277	5.11952
0.59595	20.8552	17.264	14.6123	13.0011	10.5501	5.29707
0.58285	21.0621	17.4455	14.8042	13.1189	10.7665	5.49449
0.5697	21.2843	17.6008	14.9866	13.3758	10.9902	5.68336
0.55655	21.4523	17.786	15.152	13.5591	11.1809	5.85664
0.54345	21.6244	17.9226	15.3078	13.7349	11.4107	6.05498
0.5303	21.7983	18.1004	15.4689	13.9072	11.6213	6.23039
0.51715	21.9474	18.2306	15.6593	14.1957	11.845	6.43271
0.50405	22.1069	18.3376	15.7953	14.3586	12.0464	6.62554
0.4909	22.2631	18.521	15.9523	14.4299	12.2414	6.81074
0.4778	22.4147	18.59	16.0624	14.5203	12.4351	7.00052
0.46465	22.5421	18.7575	16.2133	14.6795	12.6396	7.18939
0.4515	22.6818	18.8938	16.3655	14.8286	12.8242	7.35931
0.4384	22.8028	19.0304	16.5101	14.9496	13.0026	7.56437
0.42525	22.9141	19.1514	16.6638	15.0966	13.1765	7.7297
0.4121	23.0339	19.2584	16.7604	15.2305	13.3394	7.9259
0.399	23.1512	19.38	16.9009	15.3552	13.5209	8.10101
0.38585	23.2365	19.501	17.0568	15.4542	13.6792	8.28835
0.37275	23.3715	19.6049	17.2017	15.5813	13.8174	8.47782
0.3596	23.4782	19.7345	17.3297	15.6807	14.0133	8.63521
0.34645	23.6166	19.8262	17.4556	15.8099	14.1642	8.82927
0.33335	23.7334	19.9365	17.576	15.9025	14.321	9.00316
0.3202	23.8428	20.0572	17.6903	16.0318	14.4711	9.16055
0.30705	23.9491	20.1657	17.7991	16.1586	14.6016	9.36286
0.29395	24.053	20.2819	17.8966	16.2558	14.7412	9.52177
0.2808	24.1374	20.3683	17.9862	16.3719	14.8729	9.70056
0.2677	24.2386	20.5062	18.1166	16.4627	14.9903	9.87047
0.25455	24.3082	20.5835	18.1738	16.573	15.1248	10.019
0.2414	24.4216	20.6932	18.2918	16.6821	15.2653	10.191
0.2283	24.4891	20.7828	18.3844	16.7741	15.4218	10.3509
0.21515	24.5943	20.8702	18.4684	16.8826	15.5471	10.5104
0.202	24.6808	20.9698	18.5564	16.9932	15.6706	10.6751
0.1889	24.7587	21.0902	18.6288	17.0773	15.7696	10.8032
0.17575	24.8244	21.1626	18.7269	17.1803	15.9025	10.9743
0.16265	24.9011	21.2574	18.7841	17.2872	16.0355	11.1308
0.1495	24.976	21.3319	18.8791	17.3664	16.1296	11.2625
0.13635	25.068	21.4273	18.9402	17.4727	16.2677	11.4404
0.12325	25.112	21.5208	19.0118	17.5742	16.3738	11.569
0.1101	25.1969	21.5819	19.097	17.6445	16.4835	11.6962
0.09695	25.2755	21.6522	19.1921	17.7802	16.5901	11.856
0.08385	25.3455	21.7527	19.255	17.8712	16.6769	12.0189
0.0707	25.4106	21.7916	19.3247	17.9421	16.8138	12.1671
0.0576	25.4542	21.9254	19.4014	18.0237	16.9315	12.3022
0.04445	25.5038	21.981	19.4524	18.1243	17.0247	12.4226
0.0313	25.5808	22.1024	19.5203	18.2056	17.1195	12.5769
0.0182	25.6501	22.1403	19.6083	18.2893	17.2145	12.7059
0.00505	25.7107	22.2396	19.6572	18.3339	17.3181	12.8666
-0.0081	26.0569	22.5996	20.0114	18.6939	17.6478	13.2257
-0.0212	25.857	22.415	19.8629	18.5512	17.5439	13.2074
-0.03435	25.9081	22.4587	19.9161	18.6117	17.6295	13.3275

## Sheet: 2
strain(%)	0	0.5	1	1.5	2	2.5
V(V)	J(mA/cm2)	J	J	J	J	J
1.2	-48.5002	-62.7124	-51.0015	-43.6605	-34.0159	-25.9819
1.18685	-47.9557	-60.5512	-46.0072	-41.5796	-31.0537	-24.8048
1.17375	-45.8644	-58.7779	-41.883	-38.0348	-28.209	-21.8539
1.1606	-42.9769	-54.1931	-37.674	-33.6525	-25.4216	-19.587
1.1475	-39.5726	-48.8501	-33.0533	-32.7371	-22.7093	-17.4645
1.13435	-37.9481	-44.0516	-29.307	-33.5017	-20.091	-15.204
1.1212	-31.7895	-39.1095	-26.0468	-23.5867	-26.7668	-13.227
1.1081	-27.6593	-34.2386	-100.879	-19.8427	-14.6006	-11.4877
1.09495	-23.5665	-29.5316	-24.3577	-17.289	-12.8753	-9.69488
1.0818	-20.8909	-25.2112	-16.9965	-14.8477	-10.9894	-8.20876
1.0687	-15.6634	-20.6535	-14.1956	-12.5902	-9.29174	-6.62363
1.05555	-12.1489	-16.4899	-11.8976	-10.8015	-7.74413	-5.34001
1.0424	-8.49038	-12.9484	-10.1227	-9.225	-6.19988	-4.2075
1.0293	-5.46899	-9.43388	-7.73212	-7.94888	-4.91251	-3.21562
1.01615	-2.64974	-6.42488	-5.79451	-5.40526	-3.79274	-2.32838
1.00305	0.003375	-3.762	-4.46549	-4.17001	-2.77051	-1.56451
0.9899	2.23237	-1.63049	-2.51137	-2.979	-1.92113	-0.869994
0.97675	4.10513	0.607869	-1.15726	-1.63238	-1.16626	-0.333
0.96365	6.201	2.41687	0.0464938	-0.75825	-0.442881	0.097875
0.9505	7.90763	3.92926	1.26526	0.073125	0.11025	0.5355
0.93735	9.38326	5.22751	1.92001	-3.17925	0.664875	0.939375
0.92425	10.6515	6.76426	2.93737	1.47113	1.20113	1.27724
0.9111	11.7829	7.92188	3.94875	2.10412	1.63837	1.58251
0.898	12.768	8.92162	4.09275	2.48813	2.01487	1.85549
0.88485	13.626	9.80474	5.09962	2.98237	2.38199	2.08499
0.8717	14.3839	10.6057	5.85037	3.68474	2.69812	2.34563
0.8586	15.0461	11.2834	6.15226	4.08488	3.01424	2.58601
0.84545	15.5861	11.8969	6.78037	4.48726	3.28725	2.80876
0.8323	16.0999	12.4215	7.20751	4.91926	3.59513	3.03562
0.8192	16.269	12.9139	7.54501	5.08162	3.8745	3.26174
0.80605	16.3578	13.1516	8.33999	5.46938	3.97049	3.46837
0.79295	16.4539	13.5949	8.78476	5.83538	4.11187	3.70538
0.7798	17.1949	13.8514	9.17362	6.18787	4.40626	3.92324
0.76665	17.7705	14.1634	9.15488	6.51375	4.65601	3.9195
0.75355	17.9985	14.3876	9.56849	6.65338	5.04	4.14562
0.7404	18.2385	14.7829	9.96975	7.00237	5.17275	4.38187
0.72725	18.4571	15.0128	10.3357	7.3845	5.51624	4.56826
0.71415	18.1586	15.2333	10.6658	7.69649	5.6475	4.81087
0.701	18.7778	15.4485	10.9823	7.974	5.66699	5.10376
0.6879	19.0012	15.6341	11.2598	8.24512	6.2415	5.34974
0.67475	19.1471	15.834	11.5496	8.50312	6.52087	5.56613
0.6616	19.329	15.9964	11.8099	8.77688	6.62662	5.80387
0.6485	19.4824	16.158	12.081	8.80163	7.00838	6.01462
0.63535	19.6215	16.3526	12.3285	9.29174	7.119	5.61488
0.6222	19.7636	16.5135	12.5621	9.423	7.50749	6.44363
0.6091	19.9166	16.6316	12.7796	9.66488	7.59074	6.67575
0.59595	20.0213	16.8054	12.9499	10.0106	7.93462	6.88013
0.58285	20.1791	16.9118	13.1966	9.9225	8.0055	7.08525
0.5697	20.3134	17.1172	13.2686	10.392	8.37526	7.30575
0.55655	20.4289	17.2564	13.5904	10.6654	8.41913	7.51275
0.54345	20.5384	17.3917	13.8142	10.8281	8.88488	7.71601
0.5303	20.6254	17.5346	14.0284	10.9373	8.91113	7.92675
0.51715	20.7532	17.6936	14.2039	11.0137	9.34687	8.12962
0.50405	20.8466	17.8253	14.4037	11.3134	9.35812	8.31938
0.4909	20.9633	17.9576	14.5706	11.7315	9.70875	8.53574
0.4778	21.0375	18.0656	14.7589	11.7574	9.65287	8.72587
0.46465	21.1474	18.186	14.9363	12.1219	10.0905	8.90626
0.4515	21.2179	18.3158	15.0934	12.366	9.96112	9.11512
0.4384	21.3191	18.4245	15.2651	12.4571	10.521	9.3105
0.42525	21.4226	18.5171	15.4095	12.4384	10.4134	9.47062
0.4121	21.483	18.627	15.582	12.4883	10.7509	9.6705
0.399	21.57	18.7253	15.7222	12.6019	10.7783	9.84637
0.38585	21.6683	18.8059	15.8794	13.2443	11.166	10.0387
0.37275	21.717	18.9169	16.008	13.4194	11.1371	10.2262
0.3596	21.7935	19.0088	16.1497	13.5953	11.6396	10.3766
0.34645	21.8786	19.1186	16.2754	13.7119	11.5916	10.5649
0.33335	21.9315	19.1839	16.4201	13.8791	11.9524	10.7137
0.3202	22.0279	19.2941	16.5506	14.0445	12.0521	10.902
0.30705	22.0774	19.3987	16.6639	14.2069	12.309	11.061
0.29395	22.1655	19.4903	16.8071	14.3423	12.4309	11.226
0.2808	22.2206	19.578	16.9245	14.5331	12.3086	11.3655
0.2677	22.2495	19.665	17.0314	14.6831	12.654	11.514
0.25455	22.3552	19.7516	17.1574	14.7829	12.7151	11.6835
0.2414	22.416	19.8323	17.2718	14.9153	13.1254	11.8309
0.2283	22.4831	19.9264	17.3625	15.0765	13.1895	11.9914
0.21515	22.5274	20.0033	17.481	15.1943	13.2645	12.1294
0.202	22.5806	20.0854	17.574	15.3293	13.4452	12.2963
0.1889	22.6594	20.1743	17.6925	15.477	13.5581	12.4061
0.17575	22.7066	20.2421	17.7971	15.594	13.5761	12.5625
0.16265	22.761	20.3377	17.8564	15.711	13.7494	12.6765
0.1495	22.7846	20.4109	17.9685	15.8254	13.7925	12.8524
0.13635	22.8641	20.4784	18.0746	15.9799	14.1007	12.9604
0.12325	22.9106	20.5462	18.1493	16.065	14.4026	13.1269
0.1101	22.9654	20.6115	18.2449	16.1981	14.0276	13.2424
0.09695	23.0183	20.6809	18.318	16.3425	14.4915	13.3826
0.08385	23.0723	20.7397	18.4151	16.4002	14.4049	13.4981
0.0707	23.1157	20.8065	18.5074	16.542	14.7255	13.6335
0.0576	23.1652	20.8736	18.5666	16.6305	14.8432	13.7647
0.04445	23.193	20.9287	18.6533	16.7408	15.1549	13.8938
0.0313	23.2586	20.9895	18.7365	16.8499	14.9917	14.034
0.0182	23.277	21.0536	18.75	16.875	15	14.375
0.00505	23.352	21.1106	18.75	16.875	15	14.375
-0.0081	23.838	21.4976	18.75	16.875	15	14.375

## Sheet: 3
strain(%)	0	0.5	1	1.5	2	2.5
V(V)	J(mA/cm2)	J	J	J	J	J
1.2	-47.9854	-45.047	-44.4231	-31.2681	-84.4044	-26.0424
1.18685	-44.0099	-43.6245	-43.0646	-30.3606	-80.7652	-26.1591
1.17375	-39.9758	-41.5252	-40.976	-28.9271	-76.736	-25.4619
1.1606	-36.6825	-39.0288	-38.4446	-27.219	-75.9027	-22.9812
1.1475	-32.8239	-36.3302	-35.6483	-25.3326	-76.3404	-20.9607
1.13435	-30.0238	-33.4647	-32.6752	-23.3479	-72.2621	-19.1706
1.1212	-27.3333	-30.5132	-29.6527	-21.3431	-67.8602	-17.661
1.1081	-25.009	-27.523	-26.5754	-19.2619	-67.7229	-15.3105
1.09495	-22.2571	-24.5675	-23.6	-17.2146	-63.755	-13.5303
1.0818	-19.3879	-21.693	-20.6548	-15.2027	-52.8248	-11.8992
1.0687	-17.0527	-18.8633	-17.9296	-13.2178	-61.176	-10.146
1.05555	-13.6115	-16.0108	-15.1952	-11.2781	-52.2369	-9.1818
1.0424	-10.7364	-20.604	-12.6656	-9.41212	-61.0954	-7.4265
1.0293	-8.01504	-10.7698	-10.301	-7.63387	-44.011	-6.3492
1.01615	-5.4665	-8.1935	-8.09875	-5.95912	-54.2381	-5.5206
1.00305	-3.06908	-5.7185	-6.05542	-4.377	-49.7338	-4.2255
0.9899	-0.651894	-3.71875	-4.15979	-2.88019	-46.45	-3.5652
0.97675	1.71925	-1.40475	-2.42229	-1.61794	-9.69917	-3.5019
0.96365	3.57554	0.60025	-1.01021	-0.262125	-53.3596	-2.0553
0.9505	5.40881	2.27775	0.591669	0.946687	-52.3896	-29.3025
0.93735	7.75967	3.67525	2.00396	1.96913	-48.8629	-0.3009
0.92425	9.54877	5.313	2.96604	2.80256	-0.0951	-0.0951
0.9111	10.5863	6.72775	4.285	3.81075	0.8646	0.8646
0.898	11.9646	8.01425	5.42896	4.68225	1.3128	1.3128
0.88485	13.2096	9.137	6.47292	5.46131	1.2561	1.2561
0.8717	14.3575	10.1585	7.39792	6.15225	1.947	1.947
0.8586	15.1382	10.8747	8.26354	6.76856	2.27333	2.3292
0.84545	16.0964	11.8255	9.0475	7.28137	2.70771	2.1267
0.8323	16.4265	12.5852	9.73542	7.80769	3.08188	2.6121
0.8192	16.7229	13.2442	10.3846	8.20069	3.43083	2.9322
0.80605	17.6629	13.803	10.9537	8.66606	3.72187	3.1056
0.79295	18.5903	14.342	11.4462	9.03675	4.04542	3.2136
0.7798	18.7233	14.7843	11.9	9.35531	4.0825	3.4923
0.76665	19.4238	15.1965	12.2912	9.66263	4.13792	3.7044
0.75355	19.8048	15.5245	12.6163	9.93019	4.33586	3.8922
0.7404	19.978	15.839	12.929	10.1642	4.50646	3.9836
0.72725	19.997	16.1092	13.2035	10.4047	4.86354	4.3866
0.71415	20.0409	16.3555	13.4275	10.6217	5.17646	4.5891
0.701	20.4181	16.5598	13.62	10.8171	5.4475	4.7853
0.6879	20.4853	16.733	13.8108	11.0029	5.7325	4.9833
0.67475	20.8404	16.9392	13.9837	11.1733	5.99021	5.1756
0.6616	21.079	17.1217	14.1273	11.3481	6.2225	5.3658
0.6485	21.0094	17.2907	14.2602	11.4999	6.46563	5.5452
0.63535	21.2704	17.4588	14.3858	11.6509	6.69896	5.7264
0.6222	21.4703	17.58	14.5204	11.8033	6.92833	5.9031
0.6091	21.7398	17.69	14.6294	11.9404	7.14854	6.0792
0.59595	21.8411	17.8535	14.7329	12.0804	7.36313	6.2427
0.58285	21.9007	17.9582	14.8279	12.1971	7.57437	6.4161
0.5697	21.9941	18.091	14.9398	12.3435	7.76854	6.5748
0.55655	22.0756	18.2135	15.0415	12.4719	7.98375	6.7419
0.54345	22.0789	18.348	15.1119	12.5874	8.18604	6.8949
0.5303	22.2452	18.458	15.231	12.7059	8.36937	7.0647
0.51715	22.38	18.5538	15.3265	12.8061	8.57542	7.2153
0.50405	22.4318	18.6833	15.405	12.9214	8.76792	7.3806
0.4909	22.5052	18.7572	15.496	13.0254	8.95167	7.5216
0.4778	22.5867	18.8565	15.58	13.1364	9.13438	7.6782
0.46465	22.7324	18.9525	15.6552	13.2386	9.31542	7.8246
0.4515	22.7668	19.029	15.7402	13.3344	9.49292	7.9539
0.4384	22.8746	19.145	15.7948	13.4278	9.66604	8.1033
0.42525	23.0132	19.2033	15.8856	13.524	9.82021	8.2458
0.4121	23.0907	19.3087	15.9638	13.5947	10.0038	8.3739
0.399	23.2031	19.395	16.0148	13.6822	10.1719	8.5107
0.38585	23.2635	19.4788	16.106	13.7711	10.3167	8.6448
0.37275	23.3447	19.5225	16.1715	13.8557	10.485	8.7771
0.3596	23.4707	19.624	16.2312	13.9373	10.6496	8.8887
0.34645	23.5755	19.7203	16.304	14.0031	10.7908	9.0186
0.33335	23.4455	19.783	16.3488	14.0799	10.9454	9.1431
0.3202	23.6521	19.8265	16.4237	14.1352	11.0906	9.2694
0.30705	23.826	19.896	16.491	14.2277	11.2454	9.3882
0.29395	23.8404	19.9733	16.5454	14.3046	11.3844	9.4995
0.2808	23.9585	20.046	16.6062	14.3531	11.5083	9.6138
0.2677	24.0386	20.0835	16.6708	14.4309	11.654	9.7266
0.25455	24.0616	20.1492	16.7179	14.4971	11.7892	9.8175
0.2414	24.1532	20.1952	16.7579	14.547	11.9185	9.9357
0.2283	24.1811	20.273	16.8219	14.6222	12.0525	10.0407
0.21515	24.2558	20.3218	16.8477	14.6814	12.1767	10.1472
0.202	24.3181	20.3755	16.9213	14.7429	12.2831	10.2453
0.1889	24.3582	20.4405	16.9829	14.8129	12.4079	10.3401
0.17575	24.4281	20.4765	17.03	14.853	12.521	10.4523
0.16265	24.4739	20.5595	17.0892	14.9235	12.6629	10.2845
0.1495	24.4912	20.6082	17.1535	14.9816	12.766	10.6302
0.13635	24.5527	20.6588	17.1919	15.0253	12.9006	10.7448
0.12325	24.577	20.7125	17.2454	15.0922	13.0198	10.8279
0.1101	24.6369	20.7563	17.296	15.1356	13.1319	10.9368
0.09695	24.6959	20.789	17.3223	15.2053	13.2373	11.0235
0.08385	24.7271	20.8618	17.3773	15.2479	13.3281	11.1285
0.0707	24.7588	20.9097	17.4327	15.3075	13.4583	11.2356
0.0576	24.8276	20.9642	17.471	15.3478	13.5702	11.3184
0.04445	24.8782	21.0175	17.5177	15.3999	13.6752	11.418
0.0313	24.9256	21.0677	17.5673	15.4616	13.7604	11.511
0.0182	24.9175	21.1068	17.6054	15.5158	13.8804	12
0.00505	24.9901	21.154	17.6375	15.5456	13.9856	12
-0.0081	25.5504	21.24	17.9977	15.8779	14.2696	11.6518
-0.0212	25.1685	21.2602	17.7838	15.7033	14.1858	9.19333

## Sheet: 4
strain(%)	0	0.5	1	1.5	2	2.5
V(V)	J(mA/cm2)	J	J	J	J	J
1.2	-84.5494	-78.405	-95.2466	-62.1442	-45.9626	-32.553
1.18685	-83.6329	-79.9387	-93.6439	-60.9607	-45.0082	-32.6989
1.17375	-81.2854	-77.9445	-89.4671	-58.5604	-42.6281	-31.8274
1.1606	-77.4056	-74.721	-83.6831	-54.8531	-40.1021	-28.7265
1.1475	-72.9289	-70.9545	-77.6183	-50.8189	-38.6749	-26.2009
1.13435	-68.0584	-65.727	-70.7257	-47.2147	-30.6994	-23.9633
1.1212	-63.084	-60.9622	-63.8479	-41.6692	-30.8648	-22.0763
1.1081	-57.9139	-55.9504	-57.3937	-37.5128	-28.5926	-19.1381
1.09495	-52.6399	-50.0666	-51.1136	-33.2467	-25.5836	-16.9129
1.0818	-47.406	-44.9224	-45.2752	-29.9081	-22.9763	-14.874
1.0687	-43.2818	-40.2739	-40.3039	-26.5901	-39.3754	-12.6825
1.05555	-37.0526	-36.5344	-35.4375	-22.3466	-16.4231	-11.4773
1.0424	-32.4904	-31.2491	-30.3667	-19.6481	-14.424	-9.28313
1.0293	-28.1363	-27.0439	-26.4585	-16.6875	-13.1888	-7.9365
1.01615	-24.0326	-23.3224	-22.9804	-14.9629	-11.1356	-6.90075
1.00305	-20.2129	-19.8682	-19.8251	-13.0995	-9.39712	-5.28188
0.9899	-16.6346	-16.7111	-16.3845	-10.473	-7.40213	-4.4565
0.97675	-13.3223	-13.608	-13.7209	-8.67975	-5.82862	-4.37737
0.96365	-10.2735	-10.9871	-11.2999	-6.87263	-4.43138	-2.56912
0.9505	-7.45012	-8.45475	-9.07088	-5.574	-3.61687	-36.6281
0.93735	-4.83225	-6.44062	-7.06538	-4.0995	-2.34187	-0.376125
0.92425	-2.63625	-4.74675	-5.27325	-2.139	-1.30313	-0.118875
0.9111	-0.571875	-3.88613	-3.65325	-0.879	-3.55388	1.08075
0.898	1.62862	-3.08775	-1.93388	0.18525	0.77475	1.641
0.88485	3.52913	0.980625	-0.54075	1.19288	1.539	1.57012
0.8717	4.926	2.57025	-0.877125	2.21025	2.43825	2.43375
0.8586	6.62288	3.96637	2.394	3.14437	3.11287	2.9115
0.84545	8.06513	5.38725	3.66075	3.93825	3.64875	2.65837
0.8323	9.33825	6.60862	4.70288	3.61163	3.89887	3.26512
0.8192	10.4606	7.69575	5.38613	5.41613	4.51762	3.66525
0.80605	11.421	8.664	6.8535	6.13612	4.92563	3.882
0.79295	12.279	9.543	7.75575	6.75525	5.27513	4.017
0.7798	13.0403	10.3012	8.56087	7.32862	5.75362	4.36538
0.76665	13.6834	10.9823	9.30075	7.82888	6.06075	4.6305
0.75355	14.2132	11.5579	9.93375	8.27737	6.44138	4.86525
0.7404	14.6351	12.0712	10.4798	8.70112	6.73462	4.9795
0.72725	15.0263	12.3406	10.965	9.07125	6.97837	5.48325
0.71415	15.3199	12.8438	11.3708	9.41437	7.24762	5.73638
0.701	15.5865	13.17	11.7368	9.72563	7.4085	5.98163
0.6879	15.7781	13.4385	11.2898	10.0275	7.77188	6.22912
0.67475	15.9971	13.6935	12.3169	10.0275	7.86975	6.4695
0.6616	16.1734	13.9114	12.5539	10.5645	8.22525	6.70725
0.6485	16.3046	14.1004	12.7931	10.7993	8.41387	6.9315
0.63535	16.4805	14.3006	13.0125	11.04	8.74275	7.158
0.6222	16.602	14.49	13.2135	11.2766	8.90362	7.37888
0.6091	16.7516	14.6464	13.404	11.4889	8.99025	7.599
0.59595	16.8566	14.8271	13.5983	11.7105	9.28688	7.80337
0.58285	17.0044	14.9786	13.7689	11.9059	9.50062	8.02013
0.5697	17.1172	15.1178	13.9253	12.1264	9.75825	8.2185
0.55655	17.2316	15.2812	14.1023	12.33	9.86925	8.42737
0.54345	17.3471	15.4114	14.2492	12.5449	10.1962	8.61862
0.5303	17.4296	15.5633	14.4049	12.7339	10.2326	8.83088
0.51715	17.5586	15.6694	14.5582	12.9401	10.6575	9.01913
0.50405	17.6351	15.834	14.7146	13.089	10.653	9.22575
0.4909	17.7533	15.9443	14.8612	13.2949	10.9219	9.402
0.4778	17.8526	16.0688	15.0053	13.4438	10.6425	9.59775
0.46465	17.9138	16.1985	15.1537	13.6433	10.3609	9.78075
0.4515	18.0248	16.2926	15.3	13.8026	10.5574	9.94238
0.4384	18.1069	16.4194	15.4339	13.9766	10.5604	10.1291
0.42525	18.1691	16.5278	15.567	14.1281	11.5489	10.3072
0.4121	18.2737	16.6421	15.6848	14.2661	11.3141	10.4674
0.399	18.3506	16.7464	15.8246	14.448	11.7934	10.6384
0.38585	18.4372	16.8424	15.942	14.5897	12.051	10.806
0.37275	18.4811	16.9316	16.0354	14.7424	12.1899	10.9714
0.3596	18.588	17.0362	16.1685	14.9141	12.4207	11.1109
0.34645	18.6566	17.1367	16.293	15.0604	12.7886	11.2732
0.33335	18.7159	17.2125	16.4089	15.1943	12.7976	11.4289
0.3202	18.8029	17.3284	16.5165	15.3341	13.1164	11.5867
0.30705	18.8411	17.3955	16.6275	15.4598	13.1573	11.7352
0.29395	18.93	17.4907	16.7351	15.5876	13.4216	11.8744
0.2808	18.99	17.5601	16.8431	15.7222	13.4974	12.0172
0.2677	19.0718	17.6539	16.9477	15.8726	13.7141	12.1582
0.25455	19.1077	17.7431	17.0576	15.9878	13.7869	12.2719
0.2414	19.2135	17.8256	17.1484	16.1378	13.923	12.4196
0.2283	19.2716	17.904	17.259	16.2532	13.8941	12.5509
0.21515	19.3372	17.9895	17.3603	16.395	14.0775	12.684
0.202	19.3886	18.078	17.4634	16.4932	14.1679	12.8066
0.1889	19.4801	18.1354	17.574	16.6391	14.3453	12.9251
0.17575	19.5191	18.2081	17.6498	16.7273	14.4904	13.0654
0.16265	19.6181	18.2869	17.7656	16.8799	14.5766	12.8556
0.1495	19.6815	18.3735	17.8564	16.9838	14.7697	13.2878
0.13635	19.7422	18.4447	17.9374	17.1101	14.8039	13.431
0.12325	19.7918	18.5209	18.0394	17.2005	15.0307	13.5349
0.1101	19.8338	18.5925	18.132	17.3006	15.1571	13.671
0.09695	19.8956	18.6379	18.2363	17.4045	15.1204	13.7794
0.08385	19.9447	18.7268	18.3319	17.5211	15.5377	13.9106
0.0707	20.0194	18.7965	18.4312	17.6044	15.45	14.0445
0.0576	20.0824	18.8546	18.5033	17.7097	15.9349	14.148
0.04445	20.148	18.9266	18.6023	17.8039	15.6686	14.2725
0.0313	20.1731	18.978	18.6896	17.9104	16.1783	14.3887
0.00047976	20.2447	19.0676	18.75	18.125	16.25	15
0	20.313	19.1291	18.75	18.125	16.25	15

## Sheet: 5
strain(%)	0	0.5	1	1.5	2	2.5
V(V)	J(mA/cm2)	J	J	J	J	J
1.2	-65.7986	-49.5731	-44.7368	-37.4558	-32.7075	-13.3681
1.18685	-62.4879	-48.2543	-43.0931	-36.1196	-31.581	-11.5316
1.17375	-83.6046	-45.9154	-40.6834	-34.3714	-30.4796	-10.3023
1.1606	-54.3546	-43.0912	-37.8949	-32.0696	-27.4541	-8.91807
1.1475	-50.6075	-40.0958	-35.1499	-29.409	-38.682	-7.64755
1.13435	-46.8076	-35.9584	-31.5649	-26.9104	-20.3212	-6.16029
1.1212	-43.2301	-33.2175	-28.1906	-23.3179	-18.3649	-5.13693
1.1081	-39.4304	-29.6033	-24.9049	-21.39	-35.0801	-4.17024
1.09495	-34.5965	-26.0666	-21.627	-18.492	-10.7722	-3.35647
1.0818	-31.8546	-22.7197	-18.6	-15.7414	-10.6549	-2.53739
1.0687	-24.7891	-19.4745	-15.9825	-14.2219	-9.33975	-1.95796
1.05555	-22.7223	-16.6789	-13.5184	-11.8256	-7.84201	-1.42804
1.0424	-19.557	-13.4809	-11.1604	-22.6117	-5.76301	-1.04664
1.0293	-16.2657	-11.1341	-8.95463	-8.31074	-19.3219	-0.691831
1.01615	-14.2502	-8.19937	-7.2765	-6.84751	-3.43049	-0.39405
1.00305	-18.4883	-5.98163	-4.79363	-4.97326	-2.50838	-0.163194
0.9899	-6.76664	-3.86888	-3.47774	-3.11662	-1.94813	-0.39405
0.97675	-3.88169	-1.98638	-1.53188	-1.89824	-1.26262	-0.39405
0.96365	-1.18125	-0.393381	-0.422631	-0.954756	-0.62325	-0.39405
0.9505	0.994044	0.755631	0.667881	-0.199494	-0.728244	-0.39405
0.93735	2.74094	2.46825	1.68075	-0.160875	0.061875	-0.39405
0.92425	4.83975	2.74238	2.57963	0.858375	0.324756	-0.39405
0.9111	6.50069	4.85587	3.06675	1.29338	-6.81376	-0.39405
0.898	8.04509	6.23287	3.93112	1.75987	-37.4824	-0.39405
0.88485	9.40589	7.18951	4.63275	2.17988	0.722619	0.625
0.8717	10.5782	8.00249	5.24737	2.64676	0.4095	0.6875
0.8586	11.6658	8.73076	5.79937	2.79225	0.687006	0.75
0.84545	12.3498	8.74012	6.28951	3.14063	1.23562	0.8125
0.8323	13.3677	10.0144	6.65288	3.46801	1.28137	0.875
0.8192	14.0747	10.593	7.17899	3.61538	1.54688	0.9375
0.80605	14.6925	11.0981	7.57988	3.99412	1.77975	1.125
0.79295	15.2033	11.559	7.74976	4.33088	1.86075	1.25
0.7798	15.7086	11.9782	8.316	4.37576	2.21062	1.5625
0.76665	16.1955	12.3949	8.65876	4.76924	2.17162	1.86353
0.75355	16.6351	12.7583	8.98124	5.1705	2.41237	1.92569
0.7404	16.9947	13.0339	9.30412	5.48401	2.65537	1.92367
0.72725	17.352	13.4497	9.59999	5.17576	2.88638	2.05404
0.71415	17.6275	13.722	9.89851	6.05512	3.12787	2.16149
0.701	17.9514	14.046	10.1284	6.31988	3.34575	2.27866
0.6879	18.2254	14.3509	10.4606	6.58724	3.57862	2.38739
0.67475	18.4855	14.5316	10.7254	6.83699	3.32513	2.50842
0.6616	18.7204	14.835	10.9909	7.07662	3.52949	2.62027
0.6485	18.9711	15.0885	11.2429	7.11263	3.71512	2.72882
0.63535	19.1876	15.3517	11.4941	6.95376	3.97012	2.83957
0.6222	19.4067	15.5741	11.7345	7.49101	4.20188	2.95436
0.6091	19.6466	15.774	11.9464	7.69537	4.4055	3.07171
0.59595	19.8437	16.017	12.1883	7.65675	4.68675	3.17824
0.58285	20.0263	16.2157	12.3806	7.80262	4.74975	3.29669
0.5697	20.4666	16.4295	12.5963	7.90912	5.16226	3.41002
0.55655	20.3684	16.6069	12.7909	8.36176	5.38613	3.51398
0.54345	20.5416	16.8064	12.957	8.59312	5.57474	3.63299
0.5303	20.7252	16.9642	13.1764	8.82976	5.80913	3.73824
0.51715	20.8494	17.1461	13.3774	9.05513	5.99813	3.85962
0.50405	21.024	17.2961	13.5442	9.27	6.23174	3.97533
0.4909	21.168	17.5031	13.7389	9.48937	6.42412	4.08644
0.4778	21.3016	17.679	13.9046	9.68549	6.56689	4.20031
0.46465	21.4376	17.829	14.0768	9.89699	6.77688	4.31363
0.4515	21.4623	17.9947	14.2335	10.0785	6.85212	4.41558
0.4384	21.2692	18.1264	14.4086	10.2885	6.91238	4.53862
0.42525	21.4983	18.2516	14.538	10.4576	7.00574	4.63782
0.4121	21.7589	18.402	14.6996	10.6579	7.263	4.75554
0.399	21.8903	18.5085	14.8369	10.812	7.43962	4.86061
0.38585	21.9384	18.6559	14.967	10.9995	7.66387	4.97301
0.37275	21.9915	18.7838	15.1088	11.1686	7.83599	5.08669
0.3596	22.0702	18.9053	15.2411	11.337	8.03399	5.18112
0.34645	22.2682	19.0215	15.36	11.4915	8.217	5.29756
0.33335	22.4298	19.1456	15.4988	11.6708	8.39174	5.4019
0.3202	22.572	19.2705	15.6109	11.8013	8.604	5.49633
0.30705	22.6948	19.3575	15.7324	11.958	8.78437	5.61771
0.29395	22.8343	19.4524	15.8565	12.0855	8.955	5.71306
0.2808	22.9446	19.5694	15.9679	12.2306	9.11287	5.82033
0.2677	23.0431	19.6616	16.0961	12.3731	9.30524	5.92228
0.25455	23.1678	19.7648	16.1966	12.4935	9.44699	6.01139
0.2414	23.2227	19.8566	16.314	12.6259	9.62249	6.11463
0.2283	23.36	19.9601	16.4246	12.7714	9.7875	6.21053
0.21515	23.4279	20.0516	16.5259	12.8861	9.94913	6.30625
0.202	23.5521	20.1236	16.6177	13.023	10.1066	6.40508
0.1889	23.6142	20.2249	16.7273	13.1336	10.2341	6.48191
0.17575	23.7344	20.2875	16.7959	13.269	10.4111	6.58459
0.16265	23.8244	20.379	16.8986	13.3807	10.5649	6.67848
0.1495	23.9094	20.4656	16.9935	13.4839	10.713	6.75751
0.13635	23.9877	20.5433	17.0831	13.6076	10.8555	6.86422
0.12325	24.0647	20.6044	17.1645	13.7156	10.9721	6.94142
0.1101	24.169	20.6794	17.256	13.8232	11.1457	7.0177
0.09695	24.2393	20.7746	17.3389	13.9312	11.2654	7.11359
0.08385	24.3185	20.8425	17.4146	14.04	11.4371	7.21133
0.0707	24.3954	20.8943	17.5072	14.142	11.5005	7.30026
0.0576	24.4827	20.9666	17.5515	14.2324	11.6794	7.38131
0.04445	24.5727	21.0322	17.643	14.3524	11.7652	7.45355
0.0313	24.6492	21.0994	17.7323	14.4574	11.9434	7.54615
0.0182	24.7216	21.1624	17.8159	14.3955	11.9966	7.62353
0.00505	24.8184	21.2584	17.8759	14.3807	11.9238	7.71998
-0.0081	25.3224	21.3278	18.1444	14.3841	11.91	7.93543

## Sheet: optimization1
	0	0.5	1	1.5	2	2.5	3	3.5	4	4.5	5	5.5
-0.0091	24.307	21.5761	20.6867	18.3537	15.2784	13.1385	11.4845	10.4269	9.26995	7.74555	2.78589	2.24262
0.00605	24.2344	21.4148	20.7017	18.4509	15.2878	13.1359	11.434	10.4307	9.26501	7.69978	2.7009	2.21696
0.0212	23.5777	21.3901	20.5027	18.2092	15.2282	13.1289	11.3049	10.416	9.22193	7.67057	2.7685	2.19451
0.03635	23.5535	21.2943	20.4071	18.2137	15.1979	13.1239	11.2121	10.4043	9.24109	7.63215	2.75826	2.24765
0.0515	23.5469	21.2007	20.227	18.1692	15.1726	13.1199	11.178	10.4055	9.2384	7.71118	2.74921	2.16444
0.06665	23.5412	21.1077	20.1346	18.1342	14.2819	13.1163	11.1361	10.3969	9.23667	7.70371	2.65378	2.15456
0.0818	23.5365	21.016	20.0427	18.0946	14.26	13.1132	11.0253	10.3605	9.23424	7.7068	2.64564	2.1443
0.09695	23.5316	20.9242	19.9517	18.0678	14.2407	13.1108	10.9356	10.3212	9.23311	7.6901	2.62678	2.1344
0.1121	23.5468	20.8332	19.8817	18.032	14.2206	13.108	10.8497	10.2886	9.23112	7.66008	2.63056	2.12511
0.12725	23.5468	20.7418	19.8382	18.0031	14.1986	13.1044	10.7551	10.2589	9.22947	7.58943	2.53568	2.11532
0.1424	23.4087	20.651	19.5892	17.9754	14.1781	13.1024	10.69	10.2228	9.22783	7.61666	2.52791	2.07889
0.1576	23.3452	20.5604	19.5892	17.9489	14.1569	13.0989	10.6625	10.1933	9.22592	7.46818	2.53164	2.06952
0.17275	23.2585	20.4697	19.5856	17.9219	14.1371	13.0979	10.5719	10.1608	9.22462	7.48933	2.51289	2.06476
0.1879	23.1718	20.3793	19.5818	17.8955	14.1206	13.0944	10.5699	10.13	9.22228	7.3912	2.5052	2.07783
0.20305	23.0851	20.2887	19.5783	17.8687	14.0989	13.0939	10.5661	10.1001	9.22089	7.36174	2.49736	2.04629
0.2182	22.9984	20.2852	19.575	17.8413	14.0803	13.0889	10.4775	10.0774	9.21899	7.25547	2.4031	2.06034
0.23335	22.9117	20.2817	19.5716	17.8141	14.0629	13.0186	10.4744	10.0503	9.21812	7.25547	2.39594	2.02393
0.2485	22.8019	20.2777	19.4298	17.7895	14.0397	12.9734	10.4713	10.0215	9.21552	7.25547	2.38859	2.043
0.26365	22.7988	20.2751	19.4298	17.7617	14.019	12.9694	10.4699	10.0025	9.21474	7.25547	2.38078	2.02098
0.2788	22.7955	20.2715	19.4298	17.7335	14.0009	12.9375	10.4663	9.96996	9.21231	7.25547	2.28645	1.91125
0.29395	22.7917	20.2682	19.4298	17.7108	13.9773	12.9276	10.4648	9.95523	9.21136	7.25547	2.27929	1.94419
0.3091	22.7886	20.2652	19.4298	17.6844	13.9558	12.9008	10.4619	9.91605	9.20928	7.11653	2.2714	1.96239
0.32425	22.7856	20.262	19.4298	17.6566	13.9327	12.8827	10.46	9.90235	9.20763	6.98839	2.17702	1.96412
0.3394	22.6744	20.259	19.4298	17.6332	13.9148	12.8685	10.4568	9.87358	9.20642	6.80912	2.19677	1.89946
0.35455	22.5877	20.2561	19.4298	17.6071	13.8894	12.8434	10.4553	9.85425	9.20442	6.63043	2.13687	1.85474
0.3697	22.5091	20.2531	19.3432	17.5805	13.8668	12.822	10.4526	9.83197	9.20321	6.45181	2.09154	1.78955
0.38485	22.4224	20.2189	19.3432	17.5522	13.8447	12.8132	10.4507	9.80588	9.20113	6.27192	2.02419	1.80204
0.4	22.3357	20.1318	19.3306	17.525	13.8233	12.7838	10.4485	9.80822	9.11376	6.09283	1.99585	1.66248
0.41515	22.249	20.1318	19.3306	17.4928	13.8004	12.7728	10.4459	9.78447	9.02465	5.91339	1.9773	1.39205
0.4303	22.1623	20.1318	19.2872	17.467	13.7794	12.7492	10.4445	9.76792	8.93676	5.76296	1.93552	1.19529
0.44545	22.249	20.1318	19.2565	17.4312	13.7598	12.7326	10.4417	9.74269	8.91518	5.55426	1.72923	0.93612
0.4606	22.243	20.1318	19.2478	17.3411	13.7355	12.7133	10.44	9.72917	8.89828	5.38036	1.72403	0.5374
0.47575	22.1623	20.1318	19.0831	17.3411	13.7139	12.6971	10.4377	9.71548	8.88423	5.04111	1.42325	-0.03554
0.4909	21.8963	20.1318	18.9912	17.1883	13.693	12.6672	10.4355	9.6945	8.86881	4.86541	1.11728	-1.74916
0.50605	21.7056	19.7851	18.8967	17.0744	13.6702	12.6516	10.3462	9.67344	8.85208	4.6815	0.89885	-3.7991
0.5212	21.6666	19.6395	18.6366	16.8773	13.6471	12.6365	10.3448	9.65446	8.84939	4.52624	0.04334	-5.21195
0.53635	21.3683	19.3353	18.3376	16.6783	13.6254	12.6136	10.3422	9.63721	8.81212	4.2552	-0.88325	-6.43064
0.5515	21.0641	19.122	18.0022	16.4743	13.6	12.5969	10.3402	9.6203	8.76228	4.00418	-2.11148	-7.70307
0.56665	20.7477	18.8291	17.7274	16.3598	13.5753	12.5773	10.3378	9.59933	8.61146	3.76053	-2.98866	-8.98678
0.5818	20.4278	18.5864	17.4362	16.1473	13.5509	12.557	10.3373	9.57991	8.54645	3.51514	-3.87191	-11.1295
0.59695	20.0984	18.3497	17.1475	15.8369	13.5283	12.5282	10.3349	9.55911	8.41323	3.1933	-4.80803	-13.3293
0.6121	19.7863	18.1192	16.8589	15.4035	13.4342	12.525	10.3332	9.53805	8.38636	2.94983	-5.98598	-14.5004
0.62725	19.4777	17.8643	16.5676	15.0785	13.0268	12.1852	10.2427	9.51638	8.23614	2.7821	-6.97325	-15.4868
0.6424	19.1587	17.6173	16.2322	14.7673	12.8526	12.1072	10.0442	9.23207	8.12346	2.47726	-8.26995	-16.4463
0.6576	18.7617	17.2619	15.7849	14.4666	12.9272	11.7847	9.75734	9.15233	7.52278	2.40098	-9.09946	-17.6996
0.67275	18.3074	16.8823	15.4313	14.2594	12.6654	11.6833	9.46004	8.88363	7.37283	2.0404	-10.527	-18.9045
0.6879	17.8055	15.8014	15.0828	13.9274	12.3811	11.2603	9.06045	8.73628	7.09979	1.27677	-12.3091	-19.7929
0.70305	17.457	15.2857	14.7942	13.5677	12.0881	10.1907	9.00238	8.26995	6.77042	0.10315	-13.533	-21.0922
0.7182	16.8416	14.9936	14.3027	13.1924	11.7293	10.1153	8.86976	8.03505	6.53552	-1.53507	-14.555	-22.4349
0.73335	16.1931	14.262	13.6622	12.7815	11.3271	9.48951	8.81689	7.46384	6.09606	-3.40211	-15.5622	-23.7688
0.7485	15.4025	13.8815	13.1014	12.2658	10.6779	9.15233	8.50745	7.13533	5.76755	-4.8271	-16.7497	-25.5258
0.76365	13.531	13.0901	12.2433	11.7163	10.1561	8.81429	7.82442	6.62567	5.76669	-6.69241	-18.1963	-27.1172
0.7788	13.4322	11.9096	11.1936	11.0324	9.56145	8.02898	7.19601	6.35783	5.3437	-8.1304	-19.714	-29.1299
0.79395	12.1474	10.3918	9.87522	10.1049	9.59785	7.36936	6.49998	5.84123	4.97878	-9.79375	-21.4979	-31.1633
0.8091	10.7379	9.92983	8.90963	8.99804	7.99605	5.84816	5.68868	5.13654	4.27669	-12.4383	-23.4221	-33.6839
0.82425	9.00505	7.72474	6.03279	8.4251	5.27176	4.55233	4.93111	4.3677	3.43072	-15.5379	-25.752	-36.1395
0.8394	8.19886	4.69448	3.71589	6.19661	3.69768	2.62461	3.61361	3.41771	2.41658	-17.8981	-28.7407	-38.9852
0.85455	5.42834	1.72229	1.27503	4.07127	1.22389	0.86851	2.03173	2.24236	1.32444	-20.9111	-31.2639	-42.435
0.8697	3.14414	-1.28717	-2.43218	1.63388	-1.2655	-1.5134	0.44726	1.04014	0.79137	-24.4389	-34.5793	-45.3517
0.88485	0.11356	-4.6234	-6.06659	-1.2499	-3.66735	-3.73582	-2.45472	-1.16929	-1.60614	-28.2397	-38.264	-49.0545
0.9	-2.51999	-8.41037	-10.8564	-4.40498	-5.45898	-5.8577	-5.79269	-3.58414	-3.2799	-32.7686	-42.142	-53.3156
0.91515	-5.88171	-13.2349	-14.8609	-7.27055	-8.51438	-8.94604	-8.03592	-5.98165	-6.18187	-37.1545	-47.9277	-57.3826
0.9303	-9.64826	-17.5315	-19.636	-11.5741	-13.4438	-12.0456	-10.2583	-8.61926	-8.31242	-42.4523	-52.3657	-62.0285
0.94545	-13.1972	-22.551	-24.3453	-15.4642	-17.0747	-15.8716	-13.4264	-13.1257	-12.4236	-48.3438	-57.2144	-67.1174
0.9606	-17.3123	-26.618	-29.8129	-19.89	-21.0082	-18.8767	-17.0773	-16.1559	-15.9262	-54.6704	-63.0582	-72.1924
0.97575	-21.7012	-33.4629	-35.3958	-24.8324	-26.8407	-22.1722	-20.8738	-19.8657	-18.3497	-60.4813	-69.4828	-78.1194
0.9909	-27.1365	-38.1401	-42.246	-29.6205	-31.224	-26.123	-24.412	-24.1936	-22.3829	-67.6886	-75.2807	-85.0242
1.00605	-32.1756	-45.1445	-49.0129	-35.4357	-36.2565	-30.7559	-28.8958	-27.7101	-25.5501	-75.0285	-82.1812	-91.0119
-91.0119	-27.4809	-39.6579	-42.2176	-28.4533	-35.8823	-30.506	-28.5693

## Sheet: optimization2
	0	0.5	1	1.5	2	2.5	3	3.5	4	4.5	5	5.5
-0.0091	23.9777	21.5253	20.5004	18.2403	14.4694	13.1156	11.5328	10.4621	9.25605	7.56028	2.88367	2.5891
0.00605	23.9154	21.4267	20.4331	18.2266	14.4693	13.1223	11.4274	10.4424	9.25218	7.60409	2.88447	2.57418
0.0212	23.8532	21.3317	20.3674	18.2117	14.4691	13.1273	11.3274	10.4219	9.2485	7.64047	2.8852	2.58806
0.03635	23.7912	21.2402	20.303	18.1958	14.469	13.1307	11.2328	10.4008	9.245	7.66942	2.88585	2.40055
0.0515	23.7294	21.1521	20.2402	18.1787	14.4679	13.1324	11.1435	10.3788	9.2417	7.69093	2.88642	2.41165
0.06665	23.6676	21.0676	20.1787	18.1605	14.4656	13.1324	11.0596	10.3562	9.23857	7.705	2.86905	2.42136
0.0818	23.606	20.9866	20.1187	18.1411	14.4536	13.1307	10.9811	10.3328	9.23564	7.71164	2.87315	2.42968
0.09695	23.5446	20.9091	20.0602	18.1206	14.4284	13.1273	10.9079	10.3087	9.23289	7.71085	2.87647	2.33661
0.1121	23.4833	20.8352	20.0031	18.099	14.3323	13.1223	10.8401	10.2839	9.23034	7.70262	2.87901	2.4215
0.12725	23.4221	20.7647	19.9475	18.0762	14.248	13.1155	10.7777	10.2584	9.22797	7.68695	2.88075	2.46299
0.1424	23.361	20.6978	19.8933	18.0523	14.1755	13.1071	10.7206	10.2321	9.22578	7.66385	2.81711	2.49058
0.1576	23.3001	20.6343	19.8405	18.0273	14.1123	13.0993	10.6638	10.2007	9.22531	7.63332	2.81882	2.50427
0.17275	23.2394	20.5744	19.7892	18.0011	14.071	13.0891	10.6164	10.1689	9.2254	7.59535	2.81266	2.50406
0.1879	23.1787	20.518	19.7394	17.9739	14.049	13.076	10.5728	10.1372	9.22254	7.55047	2.79863	2.48995
0.20305	23.1182	20.4651	19.691	17.9454	14.0511	13.0611	10.5345	10.1055	9.22093	7.49771	2.77673	2.46193
0.2182	23.0579	20.4157	19.644	17.9159	14.0798	13.044	10.5061	10.0761	9.21925	7.43684	2.74696	2.42002
0.23335	22.9977	20.3698	19.5985	17.8852	14.0598	13.0242	10.4879	10.0493	9.21763	7.36778	2.70932	2.3642
0.2485	22.9376	20.3274	19.5544	17.8534	14.0394	13.0034	10.4744	10.0219	9.22075	7.29045	2.66381	2.29448
0.26365	22.9018	20.3106	19.539	17.834	14.019	12.9807	10.4656	9.99552	9.22614	7.20491	2.67275	2.38672
0.2788	22.8763	20.3009	19.5252	17.8136	13.9983	12.9573	10.4602	9.97012	9.23124	7.11146	2.67633	2.45266
0.29395	22.8301	20.2975	19.5118	17.7915	13.9771	12.933	10.4558	9.94641	9.23025	7.01055	2.67153	2.48524
0.3091	22.7848	20.2984	19.4969	17.7679	13.9558	12.9088	10.4527	9.92296	9.22314	6.90288	2.65462	2.47964
0.32425	22.739	20.299	19.4803	17.7404	13.9341	12.8847	10.4529	9.90029	9.21017	6.78923	2.62126	2.45375
0.3394	22.6914	20.2967	19.4581	17.7082	13.9121	12.8625	10.4503	9.87861	9.19203	6.67056	2.5686	2.3953
0.35455	22.6398	20.2891	19.43	17.6705	13.8902	12.8414	10.4551	9.85777	9.1693	6.54798	2.49256	2.24984
0.3697	22.5827	20.2754	19.3954	17.6268	13.8681	12.8225	10.4598	9.83746	9.14183	6.42262	2.38933	2.00773
0.38485	22.5204	20.2531	19.3528	17.5772	13.846	12.8069	10.4574	9.81799	9.11258	6.29547	2.25552	1.66814
0.4	22.4545	20.2243	19.3023	17.5229	13.8242	12.7887	10.4528	9.79903	9.08234	6.16747	2.0858	1.24305
0.41515	22.3788	20.187	19.2429	17.4632	13.8023	12.7689	10.4464	9.78054	9.05634	6.03928	1.87857	0.72776
0.4303	22.295	20.1639	19.1769	17.3994	13.7803	12.7503	10.4384	9.76298	9.02666	5.91064	1.63193	0.11136
0.44545	22.1931	20.1231	19.1051	17.3321	13.7584	12.7313	10.4291	9.74528	8.99689	5.78125	1.34301	-0.58639
0.4606	22.082	20.0525	19.0295	17.2619	13.7402	12.7118	10.4189	9.72858	8.95917	5.65158	1.00938	-1.36277
0.47575	21.9585	19.9675	18.9506	17.1901	13.7411	12.7099	10.4129	9.71083	8.92204	5.52082	0.63011	-2.21941
0.4909	21.8238	19.8534	18.8689	17.1163	13.7362	12.7016	10.4149	9.70823	8.8814	5.38742	0.20332	-3.13704
0.50605	21.7124	19.7253	18.7838	17.06	13.709	12.7	10.424	9.69996	8.86418	5.24884	-0.25342	-4.12635
0.5212	21.5402	19.5929	18.6956	17.0146	13.6826	12.6838	10.4334	9.69605	8.82995	5.10143	-0.74738	-5.16851
0.53635	21.3602	19.46	18.6222	16.9733	13.6528	12.6709	10.4416	9.68274	8.78645	4.94044	-1.28383	-6.26739
0.5515	21.1687	19.2758	18.5548	16.9285	13.6144	12.6883	10.4204	9.67529	8.73421	4.75988	-1.86936	-7.41122
0.56665	20.969	19.1064	18.4833	16.8716	13.5661	12.6501	10.3767	9.65144	8.65681	4.5526	-2.51008	-8.6027
0.5818	20.7149	18.964	18.3966	16.7932	13.5039	12.5939	10.3063	9.62544	8.56291	4.33127	-3.21318	-9.83112
0.59695	20.4795	18.8202	18.2825	16.6838	13.4353	12.4913	10.2273	9.57155	8.43784	4.07508	-3.98609	-11.0809
0.6121	20.2177	18.6529	18.1277	16.5337	13.3405	12.3424	10.156	9.49587	8.26533	3.76248	-4.83661	-12.3862
0.62725	19.9426	18.4522	17.9184	16.333	13.2163	12.1725	10.0745	9.37776	8.07894	3.37169	-5.77215	-13.7205
0.6424	19.6173	18.2113	17.6397	16.0715	13.0201	11.9626	9.97549	9.23249	7.87218	2.88106	-6.80068	-15.0743
0.6576	19.2528	17.9407	17.276	15.7388	12.8574	11.7539	9.85433	9.06437	7.66354	2.26943	-7.92966	-16.4654
0.67275	18.8414	17.582	16.8115	15.3242	12.7539	11.504	9.68776	8.86698	7.45134	1.5164	-9.16775	-17.8882
0.6879	18.3503	17.1389	16.2304	14.8173	12.5782	11.2299	9.50363	8.64085	7.23435	0.6027	-10.5224	-19.3468
0.70305	17.7806	16.5444	15.5168	14.2075	12.3586	10.8872	9.29335	8.38587	6.99993	-0.48949	-12.0005	-20.8558
0.7182	17.1272	15.8842	14.6548	13.485	12.0505	10.4889	9.02991	8.08681	6.70141	-1.77637	-13.6098	-22.4
0.73335	16.4022	15.0317	13.6288	12.6397	11.6112	9.98954	8.76479	7.78581	6.43995	-3.27232	-15.3587	-23.9704
0.7485	15.5552	14.0565	12.4232	11.6626	10.9799	9.35981	8.46467	7.45314	6.12877	-4.98975	-17.2551	-25.6394
0.76365	14.1446	12.3658	10.6698	10.344	10.2271	8.63965	8.00632	7.04718	5.80935	-6.93881	-19.477	-28.0072
0.7788	12.5938	10.4915	8.73384	8.89525	9.41749	7.7952	7.37161	6.54913	5.39169	-9.12748	-21.8467	-30.5183
0.79395	10.903	8.43356	6.61527	7.31637	8.36572	6.81052	6.59637	6.03149	4.9559	-11.5614	-24.3641	-33.1728
0.8091	9.07198	6.192	4.3141	5.60733	7.06949	5.61207	5.66336	5.30664	4.39264	-14.2431	-27.0293	-35.9706
0.82425	7.10089	3.76683	1.83034	3.76816	5.62711	4.18948	4.52928	4.40026	3.55207	-17.1725	-29.8422	-38.9117
0.8394	4.98969	1.15803	-0.83603	1.79883	3.85958	2.58616	3.13873	3.29462	2.5456	-20.3224	-32.8029	-41.9962
0.85455	2.73838	-1.63439	-3.685	-0.30063	1.7852	0.79571	1.51441	1.90567	1.26742	-23.7021	-35.9113	-45.224
0.8697	0.34695	-4.61044	-6.71656	-2.53025	-0.7085	-1.33448	-0.44668	0.07928	-0.38772	-27.3116	-39.1675	-48.5952
0.88485	-2.18459	-7.77011	-9.93072	-4.89	-3.48511	-3.68688	-2.6405	-1.99255	-2.26917	-31.1509	-42.5713	-52.1097
0.9	-4.85624	-11.1134	-13.3275	-7.37991	-6.54461	-6.26151	-5.06705	-4.3098	-4.37693	-35.2201	-46.123	-55.7676
0.91515	-7.668	-14.6403	-16.9068	-9.99996	-9.88701	-9.05835	-7.72632	-6.87249	-6.711	-39.5191	-49.8223	-59.5688
0.9303	-10.6199	-18.3509	-20.6688	-12.7501	-13.5123	-12.0774	-10.6183	-9.68061	-9.27139	-44.0479	-53.6694	-63.5133
0.94	-13.7119	-22.245	-24.6134	-15.6305	-17.4205	-15.3187	-13.7431	-12.7342	-12.0581	-48.8065	-57.6643	-67.6012
0.95	-16.944	-26.3228	-28.7405	-18.641	-21.6116	-18.7822	-17.1005	-16.0331	-15.0711	-53.795	-61.8069	-71.8324
0.96	-20.3162	-30.5843	-33.0503	-21.7816	-26.0856	-22.4679	-20.6907	-19.5775	-18.3104	-59.0132	-66.0972	-76.207
0.97	-23.8285	-35.0293	-37.5426	-25.0524	-30.8425	-26.3758	-24.5136	-23.3674	-21.7761	-64.4613	-70.5353	-80.7249
0.98	-27.4809	-39.6579	-42.2176	-28.4533	-35.8823	-30.506	-28.5693	-27.4027	-25.468	-70.1392	-75.1211	-85.3861

## Sheet: simulation vs experiment
1.2	-38.3884	-40.0418	-44.4231	-31.2681	-79.4394	-24.5105	0	20.2884	19.1941	16.8546	15.732	12.7524	10.2396
1.18685	-35.2079	-38.7773	-43.0646	-30.3606	-76.0143	-24.6203	0.05	20.1581	19.0671	16.7431	15.6278	12.6679	10.1716
1.17375	-31.9807	-36.9113	-40.976	-28.9271	-72.2222	-23.9641	0.1	20.0208	18.9332	16.6254	15.5181	12.5788	10.1
1.1606	-29.346	-34.6922	-38.4446	-27.219	-71.4378	-21.6294	0.15	19.8759	18.7917	16.5011	15.4021	12.4846	10.0243
1.1475	-26.2591	-32.2936	-35.6483	-25.3326	-71.8498	-19.7277	0.2	19.7222	18.6416	16.3693	15.2791	12.3848	9.94395
1.13435	-24.019	-29.7464	-32.6752	-23.3479	-68.0114	-18.0429	0.25	19.5588	18.4819	16.229	15.1482	12.2785	9.85843
1.1212	-21.8666	-27.1229	-29.6527	-21.3431	-63.8684	-16.6221	0.3	19.3845	18.3113	16.0791	15.0084	12.1649	9.76703
1.1081	-20.0072	-24.4649	-26.5754	-19.2619	-63.7392	-14.4099	0.35	19.1975	18.1283	15.9183	14.8584	12.043	9.66894
1.09495	-17.8057	-21.8378	-23.6	-17.2146	-60.0047	-12.7344	0.4	18.9962	17.9311	15.745	14.6967	11.9116	9.56317
1.0818	-15.5103	-19.2827	-20.6548	-15.2027	-49.7174	-11.1992	0.45	18.7783	17.7175	15.5573	14.5215	11.7693	9.44858
1.0687	-13.6422	-16.7673	-17.9296	-13.2178	-57.5774	-9.54918	0.5	18.5412	17.4848	15.3528	14.3308	11.6143	9.3237
1.05555	-10.8892	-14.2318	-15.1952	-11.2781	-49.1641	-8.64169	0.55	18.2814	17.2298	15.1287	14.1217	11.4443	9.18668
1.0424	-8.5891	-18.3147	-12.6656	-9.41212	-57.5016	-6.98965	0.6	17.9943	16.9478	14.8808	13.8905	11.2561	9.03487
1.0293	-6.41204	-9.57311	-10.301	-7.63387	-41.4222	-5.97572	0.65	17.6732	16.6323	14.6031	13.6314	11.0448	8.86406
1.01615	-4.3732	-7.28311	-8.09875	-5.95913	-51.0476	-5.19586	0.7	17.3059	16.2712	14.2847	13.3341	10.8011	8.6656
1.00305	-2.45526	-5.08311	-6.05542	-4.377	-46.8082	-3.97694	0.75	16.8649	15.8375	13.8998	12.9741	10.5017	8.41746
0.9899	-0.52151	-3.30556	-4.15979	-2.88019	-43.7176	-3.35548	0.8	16.2764	15.2586	13.3789	12.4843	10.0825	8.05796
0.97675	1.3754	-1.24867	-2.42229	-1.61794	-9.12863	-3.29591	0.85	15.3275	14.327	12.523	11.6736	9.36024	7.41156
0.96365	2.86043	0.53356	-1.01021	-0.26213	-50.2208	-1.9344	0.9	13.3913	12.4385	10.7535	9.98721	7.80457	5.97101
0.9505	4.32705	2.02467	0.59167	0.94669	-49.3078	-27.5788	0.95	8.54416	7.77597	6.33284	5.76085	3.82542	2.21638
0.93735	6.20773	3.26689	2.00396	1.96913	-45.9886	-0.2832	1	-5.38056	-5.31578	-6.14346	-6.17541	-7.51512	-8.57037
0.92425	7.63901	4.72267	2.96604	2.80256	-0.08951	-0.08951
0.9111	8.46907	5.98022	4.285	3.81075	0.81374	0.81374
0.898	9.57169	7.12378	5.42896	4.68225	1.23558	1.23558
0.88485	10.5677	8.12178	6.47292	5.46131	1.18221	1.18221
0.8717	11.486	9.02978	7.39792	6.15225	1.83247	1.83247
0.8586	12.1106	9.66644	8.26354	6.76856	2.13961	2.19219
0.84545	12.8772	10.5116	9.0475	7.28137	2.54843	2.0016
0.8323	13.1412	11.1869	9.73542	7.80769	2.90059	2.45845
0.8192	13.3783	11.7727	10.3846	8.20069	3.22902	2.75972
0.80605	14.1303	12.2693	10.9537	8.66606	3.50294	2.92292
0.79295	14.8722	12.7484	11.4462	9.03675	3.80745	3.02456
0.7798	14.9786	13.1416	11.9	9.35531	3.84235	3.28687
0.76665	15.539	13.508	12.2912	9.66263	3.89451	3.48649
0.75355	15.8439	13.7996	12.6163	9.93019	4.08081	3.66325
0.7404	15.9824	14.0791	12.929	10.1642	4.24137	3.74927
0.72725	15.9976	14.3193	13.2035	10.4047	4.57745	4.12856
0.71415	16.0327	14.5382	13.4275	10.6217	4.87196	4.31915
0.701	16.3345	14.7198	13.62	10.8171	5.12706	4.50381
0.6879	16.3882	14.8738	13.8108	11.0029	5.39529	4.69016
0.67475	16.6723	15.0571	13.9838	11.1733	5.63784	4.87115
0.6616	16.8632	15.2193	14.1273	11.3481	5.85647	5.05016
0.6485	16.8075	15.3696	14.2602	11.4999	6.08529	5.21901
0.63535	17.0163	15.5189	14.3858	11.6509	6.3049	5.38955
0.6222	17.1762	15.6267	14.5204	11.8033	6.52078	5.55586
0.6091	17.3918	15.7244	14.6294	11.9404	6.72804	5.7216
0.59595	17.4729	15.8698	14.7329	12.0804	6.93	5.87548
0.58285	17.5205	15.9629	14.8279	12.1971	7.12882	6.03868
0.5697	17.5953	16.0809	14.9398	12.3435	7.31157	6.18805
0.55655	17.6605	16.1898	15.0415	12.4719	7.51412	6.34532
0.54345	17.6631	16.3093	15.1119	12.5874	7.70451	6.48932
0.5303	17.7961	16.4071	15.231	12.7059	7.87706	6.64913
0.51715	17.904	16.4922	15.3265	12.8061	8.07098	6.79087
0.50405	17.9454	16.6073	15.405	12.9214	8.25216	6.94645
0.4909	18.0041	16.6731	15.496	13.0254	8.4251	7.07915
0.4778	18.0694	16.7613	15.58	13.1364	8.59706	7.22654
0.46465	18.1859	16.8467	15.6552	13.2386	8.76745	7.36433
0.4515	18.2134	16.9147	15.7402	13.3344	8.93451	7.48602
0.4384	18.2997	17.0178	15.7948	13.4278	9.09745	7.62664
0.42525	18.4106	17.0696	15.8856	13.524	9.24255	7.76075
0.4121	18.4726	17.1633	15.9637	13.5947	9.41529	7.88132
0.399	18.5625	17.24	16.0148	13.6822	9.57353	8.01007
0.38585	18.6108	17.3144	16.106	13.7711	9.70981	8.13628
0.37275	18.6758	17.3533	16.1715	13.8557	9.86824	8.2608
0.3596	18.7766	17.4436	16.2312	13.9373	10.0231	8.36584
0.34645	18.8604	17.5291	16.304	14.0031	10.1561	8.48809
0.33335	18.7564	17.5849	16.3487	14.0799	10.3016	8.60527
0.3202	18.9217	17.6236	16.4237	14.1352	10.4382	8.72414
0.30705	19.0608	17.6853	16.491	14.2277	10.5839	8.83595
0.29395	19.0723	17.754	16.5454	14.3046	10.7147	8.94071
0.2808	19.1668	17.8187	16.6062	14.3531	10.8314	9.04828
0.2677	19.2309	17.852	16.6708	14.4309	10.9684	9.15445
0.25455	19.2493	17.9104	16.7179	14.4971	11.0957	9.24
0.2414	19.3225	17.9513	16.7579	14.547	11.2174	9.35125
0.2283	19.3449	18.0204	16.8219	14.6222	11.3435	9.45007
0.21515	19.4047	18.0638	16.8477	14.6814	11.4604	9.55031
0.202	19.4545	18.1116	16.9213	14.7429	11.5606	9.64264
0.1889	19.4866	18.1693	16.9829	14.8129	11.678	9.73186
0.17575	19.5425	18.2013	17.03	14.853	11.7845	9.83746
0.16265	19.5791	18.2751	17.0892	14.9235	11.918	9.67953
0.1495	19.5929	18.3184	17.1535	14.9816	12.0151	10.0049
0.13635	19.6421	18.3633	17.1919	15.0253	12.1418	10.1128
0.12325	19.6616	18.4111	17.2454	15.0922	12.2539	10.191
0.1101	19.7095	18.45	17.296	15.1356	12.3594	10.2935
0.09695	19.7568	18.4791	17.3223	15.2053	12.4586	10.3751
0.08385	19.7817	18.5438	17.3773	15.2479	12.5441	10.4739
0.0707	19.807	18.5864	17.4327	15.3075	12.6667	10.5747
0.0576	19.862	18.6349	17.471	15.3478	12.772	10.6526
0.04445	19.9026	18.6822	17.5177	15.3999	12.8708	10.7463
0.0313	19.9405	18.7269	17.5673	15.4616	12.951	10.8339
0.0182	19.934	18.7616	17.6054	15.5158	13.0639	11.2941
0.00505	19.992	18.8036	17.6375	15.5456	13.1629	11.2941
-0.0081	20.4403	18.88	17.9977	15.8779	13.4302	8.61349
-0.0212	20.1348	18.898	17.7838	15.7033	13.3514	8.65255
-0.03435	20.1481	18.9296	17.8165	15.7333	13.4702	8.66557
-0.04745	20.161	18.9733	17.851	15.762	13.5672	8.79357
-0.0606	20.1894	19.028	17.9092	15.8252	13.6692	8.90965
-0.07375	20.2274	19.0764	17.9829	15.8897	13.7753	9.01004
-0.08685	20.2798	19.1347	18.0421	15.9351	13.8894	9.14134
-0.1	20.3192	19.1704	18.0944	16.0037	15.3563	9.27843

## Sheet: resistance
-0.00048623	0.11098	0.03556	1.0484
0.00217	1.33094	0.06176	1.02158
0.00214	2.54362	0.08594	0.99477
0.00321	3.02018	0.10407	1.02141
0.01312	3.8105	0.11909	1.04805
0.01807	4.51762	0.13178	1.06778
0.02137	5.01677	0.15044	1.04792
0.02462	5.43091	0.16537	1.04786
0.02461	5.79338	0.17955	1.02801
0.02793	6.23949	0.19298	1.02796
0.03458	6.57409	0.20343	1.06748
0.04012	7.07597	0.2206	1.04763
0.04467	7.55513	0.23702	1.00799
0.04909	8.00125	0.25195	1.06728
0.05685	8.5589	0.26464	1.06723
0.05918	9.00765	0.27658	1.06718
0.06472	9.50953	0.29076	1.08691
0.07136	10.0114	0.30419	1.08685
0.0769	10.4297	0.31987	1.08679
0.08248	10.9011	0.33629	1.08672
0.08611	11.3349	0.34972	1.12623
0.08882	11.723	0.37062	1.14593
0.09154	12.0882	0.3863	1.14587
0.09821	12.5121	0.40048	1.12602
0.10569	13.039	0.4169	1.10617
0.10867	13.6036	0.43183	1.10611
0.11765	14.0552	0.44451	1.16541
0.12665	14.7122	0.45646	1.10601
0.13859	15.6646	0.46541	1.16532
0.14589	16.3082	0.4781	1.14549
0.15137	16.8598	0.49079	1.14543
0.15867	17.5954	0.51094	1.16513
0.16795	18.2426	0.53035	1.22441
0.17991	18.9201	0.54528	1.22434
0.1829	19.447	0.57185	1.30113
0.18602	20.0483	0.61401	1.30096
0.19332	20.646	0.65073	1.33685
0.20245	21.3355	0.66977	1.37283
0.21707	22.117	0.68745	1.4088
0.22804	22.7146	0.70649	1.33662
0.23534	23.3582	0.72825	1.33653
0.24455	23.9361	0.74729	1.3725
0.24271	24.4417	0.76905	1.37241
0.24818	24.9934	0.79217	1.44442
0.25915	25.591	0.81801	1.40826
0.26645	26.1886	0.84521	1.55235
0.27703	27.3113	0.86017	1.48019
0.28908	28.2966	0.87649	1.51617
0.2981	29.3577	0.89417	1.51609
0.31618	30.2672	0.91388	1.6321
0.32885	31.1893	0.93357	1.53417
0.34693	32.1746	0.95572	1.63193
0.35596	32.9325	0.97048	1.59925
0.37404	33.6904	0.99263	1.56654
0.38307	34.4484	1.01724	1.6643
0.39512	35.2063	1.03447	1.66422
0.4135	36.3564	1.05662	1.63151
0.42986	37.3165	1.08123	1.69665
0.44348	38.4138	1.096	1.59873
0.4571	39.4425	1.11774	1.67326
0.48694	40.9154	1.13889	1.7322
0.51541	42.0408	1.16005	1.67308
0.55202	43.3709	1.17786	1.73204
0.57643	44.4963	1.19457	1.70246
0.60083	45.6217	1.20793	1.64337
0.6321	47.0639	1.22352	1.64331
0.65693	48.6884	1.24356	1.64322
0.67698	49.9051	1.26694	1.67264
0.69905	51.2937	1.28142	1.7021
0.71007	52.4972	1.30369	1.702
0.72479	53.608	1.31835	1.78948
0.73581	54.9041	1.33447	1.78942
0.75789	56.0149	1.34858	1.73595
0.77628	57.2184	1.36268	1.84271
0.80205	58.1441	1.37981	1.78923
0.81676	59.0699	1.3909	1.8426
0.83352	60.2117	1.40601	1.78912
0.84684	61.0493	1.42011	1.84247
0.86015	61.8032	1.4453	1.78896
0.8768	62.557	1.45336	1.89575
0.89012	63.3947	1.46847	1.89569
0.9001	64.1486	1.48359	1.86892
0.91675	65.07	1.49769	1.84215
0.94339	65.9076	1.51079	1.86881
0.9567	66.9965	1.52732	1.9277
0.97002	67.8342	1.54042	1.95436
0.98666	68.8393	1.55351	1.9543
0.99664	69.677	1.57064	2.00764
1.01592	70.5875	1.58676	2.00758
1.02257	71.4251	1.60187	1.98081
1.03588	72.4303	1.61497	1.98075
1.0492	73.2679	1.63411	2.06079
1.06251	74.1893	1.66031	2.08739
1.06915	75.362	1.67341	2.16745
1.08913	76.4509	1.68852	2.1941
1.10244	77.4561	1.71069	2.19401
1.11241	78.6288	1.72378	2.19395
1.12906	79.6339	1.7358	2.18991
1.15102	80.7902	1.74765	2.26235
1.16433	81.9629	1.75586	2.21399
1.17764	83.0518	1.77044	2.18976
1.19095	83.8894	1.78594	2.28636
1.20427	84.7271	1.79597	2.35881
1.22424	85.816	1.80144	2.35879
1.23755	86.8211	1.81147	2.33458
1.2542	87.575	1.82241	2.3587
1.26085	88.4126	1.83517	2.35865
1.2675	89.3341	1.84884	2.43109
1.27415	90.2554	1.86161	2.43103
1.28413	91.0931	1.87586	2.51748
1.30241	91.8891	1.88989	2.51742
1.3124	92.5592	1.91133	2.6048
1.31905	93.2293	1.90143	2.53924
1.32903	94.1507	1.92371	2.64848
1.34901	95.0721	1.93443	2.64843
1.35566	95.9935	1.95258	2.60463
1.36564	96.9149	1.9732	2.692
1.37562	97.6688	1.98475	2.69195
1.41182	98.7989	1.99712	2.73563
1.42809	99.9243	2.01279	2.75743
1.44434	101.152	2.07571	2.98472
1.46467	102.482	2.12882	2.7679
1.48907	103.607	2.20236	3.0925
1.51755	104.733	2.26365	3.20054
1.55823	105.858	2.3331	3.20025
1.58559	107.039	2.41073	3.41653
1.60224	107.961	2.48427	3.84942
1.62556	108.547	2.5619	4.0657
1.6422	109.385	2.63135	4.28201
1.65886	109.887	2.70081	4.49832
1.67551	110.641	2.77026	4.82293
1.69549	111.144	2.84789	5.0392
1.71548	111.897	2.90508	5.36386
1.73879	112.735	2.9582	5.90514
1.75877	113.405	3.03173	6.33803
1.77876	114.243	3.0971	6.87925
1.80324	114.987	3.14613	7.31225
1.81989	115.908	3.21558	7.63686
1.84321	116.494	3.27277	9.04451
1.85986	117.081	3.33814	9.69403
1.87985	117.332	3.41168	10.4518
1.8965	118.086	3.4893	11.6428
1.92316	118.421	3.54649	12.7255
1.95647	119.342	3.62003	13.8082
1.97979	119.51	3.68634	15.5707
1.98978	120.264	3.77621	17.1948
2.02309	120.934	3.83749	18.7107
2.0618	121.402	3.91102	20.1183
2.09178	122.24	3.98047	21.7425
2.12177	122.575	4.03766	23.7999
2.15509	123.245	4.09894	25.0993
2.19173	123.999	4.16021	26.3986
2.22505	124.753	4.23374	28.456
2.25837	124.921	4.29502	30.2968
2.28503	125.339	4.36038	31.8127
2.32839	125.854	4.4588	35.1826
2.37059	126.385	4.51835	37.353
2.40074	126.84	4.59278	39.7207
2.42486	127.143	4.65976	42.4831
2.452	127.37	4.74164	44.4561
2.48517	127.598	4.80119	47.0212
2.51532	127.901	4.88306	49.9809
2.53944	128.204	4.9426	52.3486
2.56959	128.356	5.00959	54.9137
2.59371	128.659	5.05424	57.6762
2.61784	128.81	5.09889	60.4386
2.64196	128.81	5.16587	63.793
2.67513	129.189	5.24775	66.95
2.70528	129.493	5.36684	70.1069
2.74146	129.72	5.45617	71.8825
2.77463	129.947	5.51571	74.0529
2.81685	130.326	5.60503	77.4072
2.85302	130.933	5.66457	80.1697
2.88893	131.431	5.739	82.932
2.91574	131.431	5.81343	86.2864
2.95148	131.768	5.84318	90.6276
2.99169	131.936	5.90272	92.798
3.0185	132.105	5.96226	95.7578
3.052	132.329	6.01436	98.3229
3.08105	132.385	6.06646	101.283
3.11232	132.61	6.08877	104.835
3.14261	132.817	6.15576	107.597
3.17293	132.817	6.17807	110.952
3.19718	133.071	6.22272	113.911
3.22548	133.223	6.31204	116.279
3.24772	133.173	6.3567	118.449
3.26996	133.071	6.43856	122.593
3.29421	133.325	6.47577	125.158
3.31644	133.427	6.52787	127.723
3.33868	133.63	6.55018	131.078
3.36496	133.528	6.58738	135.617
3.39326	133.63	6.6097	138.971
3.42762	133.884	6.64689	143.312
3.45188	133.884		--
3.48017	133.986		--
3.5105	134.036		--
3.55901	134.341		--
3.59843	134.527		--
3.63039	134.557		--
3.65356	134.682		--
3.67177	134.557		--
3.69659	134.64		--
3.71811	134.64		--
3.74293	134.806		--
3.76279	134.765		--
3.78927	134.848		--
3.82237	134.89		--
3.85816	135.048		--
3.88511	135.161
3.91356	135.199
3.93453	135.199
3.9555	135.161
3.97347	135.236
3.99144	135.274
4.0139	135.274
4.03786	135.349
4.06182	135.349
4.08428	135.462
4.10725	135.462
4.13421	135.462
4.16266	135.462
4.18812	135.575
4.21358	135.612
4.23604	135.725
4.25102	135.725
4.27348	135.725
4.30193	135.725
4.3199	135.8
4.34386	135.876
4.36782	135.838
4.40017	135.897
4.43368	136.065
4.47613	136.009
4.51187	136.177
4.53645	136.065
4.56102	136.29
4.59453	136.29
4.61911	136.234
4.65262	136.346
4.67496	136.458
4.70176	136.458
4.72858	136.402
4.73974	136.571
4.76432	136.627
4.78889	136.627
4.81347	136.514
4.83357	136.683
4.84921	136.683
4.86932	136.627
4.90059	136.795
4.9207	136.795
4.93858	136.739
4.96985	136.683
4.99889	136.851
5.0257	136.851
5.05475	136.851
5.08603	136.851
5.12177	136.908
5.15975	136.964
5.18209	137.02
5.20666	137.02
5.22677	136.964
5.25135	137.076
5.29156	137.076
5.31905	137.311
5.33522	137.362
5.36555	137.311
5.39183	137.311
5.42215	137.311
5.44439	137.21
5.47066	137.362
5.49896	137.362
5.52322	137.362
5.55354	137.464
5.57578	137.667
5.60812	137.565
5.64046	137.667
5.66675	137.362
5.68898	137.819
5.70717	137.769
5.73345	137.87
5.75165	137.769
5.76984	137.921
5.78398	138.023
5.8224	137.921
5.8507	137.972
5.879	137.87
5.9073	137.972
5.92751	138.074
5.95379	138.023
5.98007	138.124
6.00433	138.124
6.02656	138.226
6.05421	138.289
6.07799	138.243
6.09445	138.289
6.12006	138.289
6.13652	138.289
6.15299	138.335
6.18042	138.243
6.20054	138.335
6.23164	138.335
6.25725	138.335
6.27737	138.335
6.29017	138.289
6.31212	138.335
6.34138	138.473
6.37065	138.473
6.40174	138.565
6.43833	138.519
6.45479	138.519
6.47308	138.519
6.4932	138.519
6.51698	138.611
6.5499	138.611
6.56453	138.749
6.59218	138.785
6.6123	138.831
6.63059	138.831
6.64888	138.831
6.669	138.785
6.69461	138.831
6.71472	139.061
6.72936	139.107
6.74765	139.061
6.77143	139.107
6.79155	139.107
6.81715	139.153
6.85557	139.153
6.87934	139.291
6.89581	139.107
6.91044	139.199
6.9269	139.199
6.958	139.153
6.97629	139.107
6.99275	139.107
7.0147	139.153
7.04031	139.291
7.06408	139.291
7.08786	139.383
7.1153	139.337
7.14091	139.291
7.16652	139.291
7.19212	139.429
7.22505	139.383
7.24517	139.199
7.26529	139.245
7.28541	139.245
7.3037	139.199

## Sheet: PCE
0	1	1	1	1	1	1
0.5	0.97088	0.88915	0.91676	0.87245	0.79593	0.92257
1	0.83735	0.80261	0.84477	0.71315	0.70298	0.77892
1.5	0.749	0.73622	0.77615	0.60884	0.49746	0.51306
2	0.6747	0.68168	0.69516	0.46179	0.41031	0.39459
2.5	0.63153	0.6313	0.63386	0.39206	0.34931	0.3153
3	0.61345	0.58743	0.6018	0.25317	0.13725	0.15019
3.5	0.54217	0.41968	0.54387	0.18311
4	0.49398	0.39478	0.46119
4.5	0.39558	0.30943	0.38976
5	0.35442	0.25726	0.29246
5.5	0.2055	0.11618	0.26659
