# Supplementary material for: Mechanism and regulation of tensile-induced degradation of flexible perovskite solar cells
Source: Royal Society of Chemistry journal article supplement (doi:10.1039/d4ya00086b), 2024-01-01
Supplement: d4ya00086b3.xlsx [file d4ya00086b3.xlsx]

## Sheet: Sample 1 JV Data
0 Strain		0.005 Strain		0.01 Strain		0.015 Strain		0.02 Strain		0.025 Strain		0.03 Strain		0.035 Strain		0.04 Strain		0.045 Strain
J	V	J	V	J	V	J	V	J	V	J	V	J	V	J	V	J	V	J
0.0005	-0.1	0.00055845	-0.1	0.00066369	-0.1	0.00061582	-0.1	0.00067185	-0.1	0.00067404	-0.1	0.00064862	-0.1	0.00056203	-0.1	0.00064801	-0.1	0.00065128
0.00050402	-0.08485	0.00049746	-0.08485	0.0005691	-0.08485	0.00051842	-0.08485	0.00056414	-0.08485	0.00055532	-0.08485	0.00051173	-0.08485	0.00043188	-0.08485	0.0004904	-0.08485	0.000492
0.00048652	-0.0697	0.00047307	-0.0697	0.00051276	-0.0697	0.00046523	-0.0697	0.00050096	-0.0697	0.00048523	-0.0697	0.00043381	-0.0697	0.00035597	-0.0697	0.00040367	-0.0697	0.00040686
0.00047591	-0.05455	0.00045926	-0.05455	0.00047493	-0.05455	0.00043313	-0.05455	0.00045845	-0.05455	0.00043712	-0.05455	0.00037984	-0.05455	0.00030742	-0.05455	0.00034223	-0.05455	0.00034506
0.00046834	-0.0394	0.00044981	-0.0394	0.00045011	-0.0394	0.0004125	-0.0394	0.0004298	-0.0394	0.00040351	-0.0394	0.00034244	-0.0394	0.00027631	-0.0394	0.00029788	-0.0394	0.00029943
0.00046286	-0.02425	0.00044271	-0.02425	0.0004325	-0.02425	0.00039776	-0.02425	0.00040946	-0.02425	0.00037975	-0.02425	0.00031632	-0.02425	0.00025514	-0.02425	0.0002661	-0.02425	0.00026609
0.00032644	-0.0091	0.00032077	-0.0091	0.00031901	-0.0091	0.000278665	-0.0091	0.000249408	-0.0091	0.00023625	-0.0091	0.00019756	-0.0091	0.00013996	-0.0091	0.000115435	-0.0091	0.00010417
0.00032687	0.00605	0.000320301	0.00605	0.000302041	0.00605	0.00027913	0.00605	0.000249583	0.00605	0.000236172	0.00605	0.00018551	0.00605	0.00013805	0.00605	0.000125361	0.00605	0.000103337
0.0003259	0.0212	0.00032023	0.0212	0.00030124	0.0212	0.000277289	0.0212	0.0002475	0.0212	0.00023406	0.0212	0.0001823	0.0212	0.00013807	0.0212	0.000125151	0.0212	0.000101058
0.00032506	0.03635	0.00032018	0.03635	0.000301226	0.03635	0.000276475	0.03635	0.00024647	0.03635	0.000232984	0.03635	0.00018198	0.03635	0.000138069	0.03635	0.000125034	0.03635	9.9785e-05
0.00032508	0.0515	0.00032041	0.0515	0.000301467	0.0515	0.000275828	0.0515	0.000245701	0.0515	0.000232167	0.0515	0.000181354	0.0515	0.000138038	0.0515	0.000124942	0.0515	9.879e-05
0.00032469	0.06665	0.00032012	0.06665	0.000297847	0.06665	0.00027527	0.06665	0.000245034	0.06665	0.000231394	0.06665	0.00018116	0.06665	0.000137976	0.06665	0.000124869	0.06665	9.799e-05
0.00032456	0.0818	0.000320391	0.0818	0.000297306	0.0818	0.000274751	0.0818	0.000244448	0.0818	0.000230735	0.0818	0.000181139	0.0818	0.00013792	0.0818	0.000124797	0.0818	9.7235e-05
0.000324099	0.09695	0.000320111	0.09695	0.0002968	0.09695	0.000274317	0.09695	0.000243943	0.09695	0.000230095	0.09695	0.000180376	0.09695	0.000137869	0.09695	0.00012474	0.09695	9.6606e-05
0.00032423	0.1121	0.000320076	0.1121	0.00029631	0.1121	0.00027386	0.1121	0.000242408	0.1121	0.000229587	0.1121	0.000179766	0.1121	0.000137821	0.1121	0.000124679	0.1121	9.5951e-05
0.00032407	0.12725	0.000320045	0.12725	0.000296151	0.12725	0.000273437	0.12725	0.000242915	0.12725	0.000229006	0.12725	0.000179228	0.12725	0.000137776	0.12725	0.000124626	0.12725	9.5391e-05
0.000324087	0.1424	0.000320016	0.1424	0.000295449	0.1424	0.000273042	0.1424	0.000242423	0.1424	0.000228478	0.1424	0.000179174	0.1424	0.000136734	0.1424	0.000124578	0.1424	9.4869e-05
0.000324182	0.1576	0.000319987	0.1576	0.00029497	0.1576	0.000272657	0.1576	0.000241958	0.1576	0.000227954	0.1576	0.000179127	0.1576	0.000136695	0.1576	0.000124532	0.1576	9.4364e-05
0.000324581	0.17275	0.000319654	0.17275	0.000294521	0.17275	0.000272289	0.17275	0.000241532	0.17275	0.000227514	0.17275	0.000179083	0.17275	0.000135653	0.17275	0.00012449	0.17275	9.3931e-05
0.000324238	0.1879	0.000319345	0.1879	0.000294118	0.1879	0.000271971	0.1879	0.000241154	0.1879	0.000227086	0.1879	0.000179042	0.1879	0.000135615	0.1879	0.00012445	0.1879	9.349e-05
0.00032344	0.20305	0.000319108	0.20305	0.000293736	0.20305	0.000271617	0.20305	0.000240737	0.20305	0.000226646	0.20305	0.000178997	0.20305	0.000135579	0.20305	0.000124111	0.20305	9.3114e-05
0.00032352	0.2182	0.000318844	0.2182	0.000293351	0.2182	0.000271257	0.2182	0.000240337	0.2182	0.000226225	0.2182	0.000178955	0.2182	0.000135544	0.2182	0.000123064	0.2182	9.2687e-05
0.000323217	0.23335	0.000318606	0.23335	0.000293023	0.23335	0.000270927	0.23335	0.000239993	0.23335	0.000225813	0.23335	0.000178918	0.23335	0.000134514	0.23335	0.000122337	0.23335	9.2299e-05
0.000323885	0.2485	0.000318365	0.2485	0.000292616	0.2485	0.000270543	0.2485	0.000239595	0.2485	0.000225424	0.2485	0.000178875	0.2485	0.000134478	0.2485	0.000120303	0.2485	9.1965e-05
0.000322954	0.26365	0.000318152	0.26365	0.00029227	0.26365	0.000270186	0.26365	0.00023924	0.26365	0.000225079	0.26365	0.000178319	0.26365	0.000134446	0.26365	0.000119265	0.26365	9.1601e-05
0.00032246	0.2788	0.000317881	0.2788	0.000291928	0.2788	0.000268867	0.2788	0.000238892	0.2788	0.000224675	0.2788	0.000177793	0.2788	0.000134415	0.2788	0.000117231	0.2788	9.1275e-05
0.00032269	0.29395	0.000317617	0.29395	0.000291627	0.29395	0.00026855	0.29395	0.000238567	0.29395	0.0002243	0.29395	0.00017736	0.29395	0.000133388	0.29395	0.000117201	0.29395	9.0997e-05
0.00032247	0.3091	0.000317362	0.3091	0.000291283	0.3091	0.000268242	0.3091	0.000238182	0.3091	0.000223904	0.3091	0.00017729	0.3091	0.000132537	0.3091	0.00011661	0.3091	9.0674e-05
0.00032292	0.32425	0.000317115	0.32425	0.000290922	0.32425	0.00026831	0.32425	0.000237827	0.32425	0.000223538	0.32425	0.000176675	0.32425	0.00013038	0.32425	0.00011345	0.32425	9.0386e-05
0.00032228	0.3394	0.000316826	0.3394	0.000290549	0.3394	0.00026638	0.3394	0.000237466	0.3394	0.00022311	0.3394	0.000175641	0.3394	0.00012968	0.3394	0.00011031	0.3394	9.0106e-05
0.000322567	0.35455	0.000316539	0.35455	0.000290221	0.35455	0.00026344	0.35455	0.000237111	0.35455	0.000222728	0.35455	0.000175017	0.35455	0.00012657	0.35455	0.00010737	0.35455	9.0556e-05
0.00032125	0.3697	0.00031628	0.3697	0.000288836	0.3697	0.00026037	0.3697	0.000236742	0.3697	0.000222405	0.3697	0.000174564	0.3697	0.0001239	0.3697	0.00010394	0.3697	8.9126e-05
0.00032069	0.38485	0.000316054	0.38485	0.000288107	0.38485	0.00026727	0.38485	0.000236367	0.38485	0.00021949	0.38485	0.0001733	0.38485	0.00012136	0.38485	0.00010086	0.38485	8.9102e-05
0.000320549	0.4	0.00031573	0.4	0.0002879	0.4	0.00026442	0.4	0.000236008	0.4	0.00021932	0.4	0.0001725	0.4	0.00011841	0.4	0.00010034	0.4	8.7497e-05
0.000320216	0.41515	0.000315399	0.41515	0.00028578	0.41515	0.00026114	0.41515	0.000235666	0.41515	0.00021832	0.41515	0.00016666	0.41515	0.00011573	0.41515	0.00010033	0.41515	8.7352e-05
0.000319825	0.4303	0.00031529	0.4303	0.00028332	0.4303	0.00025789	0.4303	0.000235279	0.4303	0.00021724	0.4303	0.000165434	0.4303	0.00011293	0.4303	0.00010035	0.4303	8.539e-05
0.000319545	0.44545	0.000315142	0.44545	0.00028268	0.44545	0.00025659	0.44545	0.000232933	0.44545	0.000216836	0.44545	0.000164035	0.44545	0.00011036	0.44545	0.000100084	0.44545	8.516e-05
0.000319501	0.4606	0.00031518	0.4606	0.00028116	0.4606	0.00025634	0.4606	0.000232596	0.4606	0.00021542	0.4606	0.000163376	0.4606	0.00010748	0.4606	9.5442e-05	0.4606	8.206e-05
0.000319462	0.47575	0.00031475	0.47575	0.00028095	0.47575	0.00025807	0.47575	0.000231196	0.47575	0.000213293	0.47575	0.000162347	0.47575	0.00010492	0.47575	9.174e-05	0.47575	7.937e-05
0.000319427	0.4909	0.000314801	0.4909	0.0002787	0.4909	0.00025522	0.4909	0.000231384	0.4909	0.000211996	0.4909	0.000161316	0.4909	0.0001023	0.4909	8.683e-05	0.4909	7.72e-05
0.000318383	0.50605	0.000314408	0.50605	0.00027728	0.50605	0.00025271	0.50605	0.000230483	0.50605	0.000210965	0.50605	0.00016029	0.50605	0.00010001	0.50605	8.337e-05	0.50605	7.462e-05
0.000318344	0.5212	0.00031389	0.5212	0.00027619	0.5212	0.00024948	0.5212	0.000229111	0.5212	0.000208351	0.5212	0.000158258	0.5212	0.0001043	0.5212	8.025e-05	0.5212	7.275e-05
0.000317313	0.53635	0.00031365	0.53635	0.00027492	0.53635	0.00024616	0.53635	0.000229075	0.53635	0.000206046	0.53635	0.000156234	0.53635	0.00010177	0.53635	7.735e-05	0.53635	7.038e-05
0.000317267	0.5515	0.00031336	0.5515	0.000273767	0.5515	0.00024402	0.5515	0.000225012	0.5515	0.00020273	0.5515	0.000154204	0.5515	0.00010079	0.5515	7.495e-05	0.5515	6.858e-05
0.000316221	0.56665	0.00031297	0.56665	0.000271544	0.56665	0.00024002	0.56665	0.000223102	0.56665	0.00019903	0.56665	0.000152177	0.56665	0.00010023	0.56665	7.234e-05	0.56665	6.629e-05
0.000316797	0.5818	0.00031241	0.5818	0.000270131	0.5818	0.0002361	0.5818	0.00021768	0.5818	0.000193061	0.5818	0.000150152	0.5818	0.00010037	0.5818	7.026e-05	0.5818	6.428e-05
0.00031555	0.59695	0.0003114	0.59695	0.00026804	0.59695	0.00023349	0.59695	0.00021417	0.59695	0.000191773	0.59695	0.000146126	0.59695	9.268e-05	0.59695	6.774e-05	0.59695	6.248e-05
0.00031033	0.6121	0.000308526	0.6121	0.00026483	0.6121	0.0002308	0.6121	0.00021054	0.6121	0.00018907	0.6121	0.000142098	0.6121	8.715e-05	0.6121	6.538e-05	0.6121	6.048e-05
0.00030905	0.62725	0.00030504	0.62725	0.0002616	0.62725	0.00022738	0.62725	0.00020705	0.62725	0.00018566	0.62725	0.000136073	0.62725	8.262e-05	0.62725	6.304e-05	0.62725	5.834e-05
0.00030786	0.6424	0.00030365	0.6424	0.000258841	0.6424	0.00022418	0.6424	0.00020345	0.6424	0.00018023	0.6424	0.000125047	0.6424	7.954e-05	0.6424	6.093e-05	0.6424	5.638e-05
0.00030536	0.6576	0.00029622	0.6576	0.00025535	0.6576	0.00022083	0.6576	0.00019959	0.6576	0.00017675	0.6576	0.000120191	0.6576	7.46e-05	0.6576	5.886e-05	0.6576	5.434e-05
0.00030265	0.67275	0.00029206	0.67275	0.000252315	0.67275	0.00021802	0.67275	0.00019585	0.67275	0.000169069	0.67275	0.00011744	0.67275	7.198e-05	0.67275	5.691e-05	0.67275	5.238e-05
0.00029771	0.6879	0.00028767	0.6879	0.000250277	0.6879	0.00021463	0.6879	0.00019186	0.6879	0.000162693	0.6879	0.00010407	0.6879	6.843e-05	0.6879	5.487e-05	0.6879	5.044e-05
0.00029309	0.70305	0.00028377	0.70305	0.000245239	0.70305	0.0002115	0.70305	0.00018829	0.70305	0.00015914	0.70305	0.0001138	0.70305	6.504e-05	0.70305	5.304e-05	0.70305	4.877e-05
0.00028824	0.7182	0.00027844	0.7182	0.000235197	0.7182	0.00020773	0.7182	0.00018394	0.7182	0.00014934	0.7182	0.00010048	0.7182	6.231e-05	0.7182	5.09e-05	0.7182	4.677e-05
0.00027998	0.73335	0.00027324	0.73335	0.000225159	0.73335	0.00020388	0.73335	0.00017951	0.73335	0.00014513	0.73335	0.00010471	0.73335	5.913e-05	0.73335	4.89e-05	0.73335	4.487e-05
0.0002736	0.7485	0.00026772	0.7485	0.000220106	0.7485	0.00019957	0.7485	0.00017502	0.7485	0.00014092	0.7485	9.343e-05	0.7485	5.578e-05	0.7485	4.632e-05	0.7485	4.316e-05
0.00026018	0.76365	0.00026251	0.76365	0.000210051	0.76365	0.00019469	0.76365	0.00016905	0.76365	0.00013577	0.76365	8.823e-05	0.76365	5.321e-05	0.76365	4.452e-05	0.76365	4.114e-05
0.00025366	0.7788	0.0002555	0.7788	0.00019905	0.7788	0.00018916	0.7788	0.00016277	0.7788	0.00013033	0.7788	8.392e-05	0.7788	5.065e-05	0.7788	4.234e-05	0.7788	3.91e-05
0.00024659	0.79395	0.000248	0.79395	0.00019111	0.79395	0.00018234	0.79395	0.00015529	0.79395	0.00012383	0.79395	8e-05	0.79395	4.763e-05	0.79395	4.039e-05	0.79395	3.69e-05
0.00024019	0.8091	0.00023993	0.8091	0.00018151	0.8091	0.0001739	0.8091	0.00014607	0.8091	0.00011636	0.8091	7.496e-05	0.8091	4.305e-05	0.8091	3.817e-05	0.8091	3.474e-05
0.0002305	0.82425	0.00022925	0.82425	0.00016921	0.82425	0.00016401	0.82425	0.00013503	0.82425	0.00010692	0.82425	6.953e-05	0.82425	3.905e-05	0.82425	3.517e-05	0.82425	3.195e-05
0.00021932	0.8394	0.00021631	0.8394	0.00015385	0.8394	0.00015104	0.8394	0.00012074	0.8394	0.00010209	0.8394	6.307e-05	0.8394	3.314e-05	0.8394	3.228e-05	0.8394	2.885e-05
0.00020689	0.85455	0.00020095	0.85455	0.00013526	0.85455	0.00013537	0.85455	0.00010367	0.85455	8.349e-05	0.85455	5.449e-05	0.85455	2.486e-05	0.85455	2.861e-05	0.85455	2.517e-05
0.00019009	0.8697	0.00017995	0.8697	0.00011223	0.8697	0.00011629	0.8697	8.847e-05	0.8697	6.596e-05	0.8697	4.433e-05	0.8697	1.197e-05	0.8697	2.355e-05	0.8697	2.032e-05
0.00016963	0.88485	0.00015447	0.88485	9.074e-05	0.88485	9.804e-05	0.88485	6.088e-05	0.88485	4.625e-05	0.88485	3.127e-05	0.88485	8.59e-06	0.88485	1.709e-05	0.88485	1.44e-05
0.00014431	0.9	0.00012108	0.9	5.468e-05	0.9	6.631e-05	0.9	3.279e-05	0.9	2.393e-05	0.9	1.604e-05	0.9	1.016e-05	0.9	1.443e-05	0.9	9.6e-06
0.00011268	0.91515	9.164e-05	0.91515	1.78e-05	0.91515	3.234e-05	0.91515	3.95e-06	0.91515	1.33e-06	0.91515	6e-08	0.91515	-6.4e-07	0.91515	2.26e-06	0.91515	-2.03e-06
8.737e-05	0.9303	3.125e-05	0.9303	-2.316e-05	0.9303	-5.61e-06	0.9303	-3.102e-05	0.9303	-2.682e-05	0.9303	-2.124e-05	0.9303	-1.949e-05	0.9303	-1.189e-05	0.9303	-1.237e-05
3.242e-05	0.94545	-3.305e-05	0.94545	-6.923e-05	0.94545	-4.771e-05	0.94545	-7.055e-05	0.94545	-5.996e-05	0.94545	-4.833e-05	0.94545	-9.668e-05	0.94545	-3.132e-05	0.94545	-2.954e-05
-2.642e-05	0.9606	-0.00010486	0.9606	-0.00012098	0.9606	-9.856e-05	0.9606	-0.00011216	0.9606	-9.433e-05	0.9606	-7.757e-05	0.9606	-0.00010491	0.9606	-5.279e-05	0.9606	-4.875e-05
-9.426e-05	0.97575	-0.00019981	0.97575	-0.00018204	0.97575	-0.00015792	0.97575	-0.00015841	0.97575	-0.00013315	0.97575	-0.00011185	0.97575	-9.759e-05	0.97575	-7.781e-05	0.97575	-7.139e-05
-0.00020224	0.9909	-0.00030219	0.9909	-0.00024998	0.9909	-0.00022045	0.9909	-0.00020787	0.9909	-0.00017579	0.9909	-0.00014886	0.9909	-0.00014087	0.9909	-0.00010943	0.9909	-9.757e-05
-0.00029284	1.00605	-0.0004164	1.00605	-0.00032828	1.00605	-0.00029455	1.00605	-0.00026283	1.00605	-0.00022568	1.00605	-0.00018964	1.00605	-0.00017315	1.00605	-0.00014222	1.00605	-0.00013022
-0.0004058	1.0212	-0.0005417	1.0212	-0.00041788	1.0212	-0.00037588	1.0212	-0.00032417	1.0212	-0.00027677	1.0212	-0.00023492	1.0212	-0.00021266	1.0212	-0.00017945	1.0212	-0.00016469
-0.00051813	1.03635	-0.00068004	1.03635	-0.00052055	1.03635	-0.0004652	1.03635	-0.00039147	1.03635	-0.00033572	1.03635	-0.0002864	1.03635	-0.00025707	1.03635	-0.00022079	1.03635	-0.0002034
-0.00064316	1.0515	-0.00082079	1.0515	-0.00063858	1.0515	-0.00056509	1.0515	-0.000466	1.0515	-0.00042108	1.0515	-0.00034178	1.0515	-0.00031504	1.0515	-0.00026796	1.0515	-0.00024684
-0.00078348	1.06665	-0.00097359	1.06665	-0.00077106	1.06665	-0.00067626	1.06665	-0.00054845	1.06665	-0.00052619	1.06665	-0.00040314	1.06665	-0.00036744	1.06665	-0.00031945	1.06665	-0.00029483
-0.00093507	1.0818	-0.00114	1.0818	-0.0009178	1.0818	-0.00080127	1.0818	-0.00063901	1.0818	-0.00060235	1.0818	-0.00047132	1.0818	-0.00042906	1.0818	-0.00037574	1.0818	-0.00034767
-0.00108	1.09695	-0.00129	1.09695	-0.0011	1.09695	-0.00093701	1.09695	-0.00073699	1.09695	-0.00068458	1.09695	-0.0005459	1.09695	-0.00048937	1.09695	-0.00043622	1.09695	-0.00040524
-0.00128	1.1121	-0.00144	1.1121	-0.00127	1.1121	-0.00109	1.1121	-0.00084283	1.1121	-0.00073482	1.1121	-0.00062589	1.1121	-0.00056044	1.1121	-0.00050288	1.1121	-0.00046723
-0.00144	1.12725	-0.00161	1.12725	-0.00145	1.12725	-0.00124	1.12725	-0.00095509	1.12725	-0.00083888	1.12725	-0.00071031	1.12725	-0.00063241	1.12725	-0.00057463	1.12725	-0.00053434
-0.00162	1.1424	-0.00172	1.1424	-0.00163	1.1424	-0.00139	1.1424	-0.0011	1.1424	-0.00093342	1.1424	-0.00080108	1.1424	-0.00071168	1.1424	-0.00065107	1.1424	-0.00060612
-0.00179	1.1576	-0.00187	1.1576	-0.00182	1.1576	-0.00155	1.1576	-0.00121	1.1576	-0.00106	1.1576	-0.00089674	1.1576	-0.00079776	1.1576	-0.00073302	1.1576	-0.00068286
-0.00197	1.17275	-0.00202	1.17275	-0.00201	1.17275	-0.00171	1.17275	-0.00134	1.17275	-0.00116	1.17275	-0.00099554	1.17275	-0.00088464	1.17275	-0.00081922	1.17275	-0.00076417
-0.00215	1.1879	-0.00216	1.1879	-0.00221	1.1879	-0.00187	1.1879	-0.00147	1.1879	-0.00128	1.1879	-0.00114	1.1879	-0.00097508	1.1879	-0.00091038	1.1879	-0.00084942
-0.0023	1.20305	-0.0023	1.20305	-0.0024	1.20305	-0.00203	1.20305	-0.00161	1.20305	-0.00139	1.20305	-0.00124	1.20305	-0.0011	1.20305	-0.001	1.20305	-0.00093757
-0.00248	1.2182	-0.00245	1.2182	-0.0026	1.2182	-0.00219	1.2182	-0.00175	1.2182	-0.00153	1.2182	-0.00135	1.2182	-0.00119	1.2182	-0.00114	1.2182	-0.00103
-0.00265	1.23335	-0.00259	1.23335	-0.00282	1.23335	-0.00235	1.23335	-0.00189	1.23335	-0.00167	1.23335	-0.00146	1.23335	-0.00128	1.23335	-0.00124	1.23335	-0.00116
-0.00282	1.2485	-0.00272	1.2485	-0.00301	1.2485	-0.00251	1.2485	-0.00204	1.2485	-0.00179	1.2485	-0.00158	1.2485	-0.00139	1.2485	-0.00134	1.2485	-0.00125
-0.00298	1.26365	-0.00286	1.26365	-0.00322	1.26365	-0.00267	1.26365	-0.00218	1.26365	-0.00191	1.26365	-0.0017	1.26365	-0.00149	1.26365	-0.00145	1.26365	-0.00135
-0.00317	1.2788	-0.00299	1.2788	-0.0034	1.2788	-0.0028	1.2788	-0.00232	1.2788	-0.00205	1.2788	-0.00183	1.2788	-0.00159	1.2788	-0.00156	1.2788	-0.00145
-0.00331	1.29395	-0.00311	1.29395	-0.00356	1.29395	-0.00294	1.29395	-0.00246	1.29395	-0.00217	1.29395	-0.00195	1.29395	-0.0017	1.29395	-0.00167	1.29395	-0.00156
-0.00344	1.3091	-0.00322	1.3091	-0.00376	1.3091	-0.00307	1.3091	-0.00261	1.3091	-0.0023	1.3091	-0.00208	1.3091	-0.00181	1.3091	-0.00179	1.3091	-0.00166
-0.00358	1.32425	-0.00335	1.32425	-0.00387	1.32425	-0.0032	1.32425	-0.00275	1.32425	-0.00243	1.32425	-0.0022	1.32425	-0.00191	1.32425	-0.0019	1.32425	-0.00177
-0.0037	1.3394	-0.00346	1.3394	-0.00402	1.3394	-0.00332	1.3394	-0.00289	1.3394	-0.00255	1.3394	-0.00234	1.3394	-0.00202	1.3394	-0.00202	1.3394	-0.00187
-0.00383	1.35455	-0.00358	1.35455	-0.00418	1.35455	-0.00344	1.35455	-0.00302	1.35455	-0.00268	1.35455	-0.00246	1.35455	-0.00213	1.35455	-0.00213	1.35455	-0.00198
-0.00395	1.3697	-0.00373	1.3697	-0.00432	1.3697	-0.00355	1.3697	-0.00315	1.3697	-0.00281	1.3697	-0.00258	1.3697	-0.00223	1.3697	-0.00224	1.3697	-0.00208
-0.0041	1.38485	-0.00386	1.38485	-0.00447	1.38485	-0.00366	1.38485	-0.00329	1.38485	-0.00292	1.38485	-0.0027	1.38485	-0.00233	1.38485	-0.00235	1.38485	-0.00219
-0.00427	1.4	-0.00399	1.4	-0.00461	1.4	-0.00376	1.4	-0.00342	1.4	-0.00305	1.4	-0.00281	1.4	-0.00244	1.4	-0.00246	1.4	-0.00229

## Sheet: Sample 2 JV Data
	0 Strain		0.5% Strain		1.0%- Strain		1.5% Strain		2.0% Strain		2.5% Strain		3.0% Strain		3.5% Strain		4.0% Strain		4.5% Strain		5.0% Strain
V	J	V	J	V	J	V	J	V	J	V	J	V	J	V	J	V	J	V	J	V	J
-0.0091	23.3627	-0.1	0.00069705	-0.1	0.00070753	-0.1	0.00062561	-0.1	0.00056711	-0.1	0.00046686	-0.1	0.00116	-0.1	0.00055372	-0.1	0.00117	-0.1	0.00116	-0.1	0.00117
0.00605	22.7851	-0.08485	0.00058287	-0.08485	0.00060215	-0.08485	0.00051208	-0.08485	0.00045603	-0.08485	0.00037476	-0.08485	0.00080561	-0.08485	0.00042911	-0.08485	0.00079094	-0.08485	0.00076461	-0.08485	0.00076213
0.0212	22.7844	-0.0697	0.00051905	-0.0697	0.00052731	-0.0697	0.00045266	-0.0697	0.00040361	-0.0697	0.00030847	-0.0697	0.00067057	-0.0697	0.00036427	-0.0697	0.00060804	-0.0697	0.00057462	-0.0697	0.00056474
0.03635	22.7699	-0.05455	0.0004791	-0.05455	0.00047814	-0.05455	0.00041764	-0.05455	0.00037331	-0.05455	0.00027114	-0.05455	0.00057473	-0.05455	0.00032535	-0.05455	0.00048838	-0.05455	0.00044984	-0.05455	0.00043485
0.0515	22.7589	-0.0394	0.00045157	-0.0394	0.00044419	-0.0394	0.00039385	-0.0394	0.00035299	-0.0394	0.00024903	-0.0394	0.00050859	-0.0394	0.00029934	-0.0394	0.00041353	-0.0394	0.00037272	-0.0394	0.00035419
0.06665	22.7499	-0.02425	0.00043011	-0.02425	0.00041968	-0.02425	0.00037595	-0.02425	0.00033758	-0.02425	0.00023465	-0.02425	0.00046934	-0.02425	0.00028003	-0.02425	0.00036443	-0.02425	0.0003232	-0.02425	0.00030296
0.0818	22.7415	-0.0091	0.000341332	-0.0091	0.00032009	-0.0091	0.000296171	-0.0091	0.000262536	-0.0091	0.00023449	-0.0091	0.000223705	-0.0091	0.00020651	-0.0091	0.000193007	-0.0091	0.000158898	-0.0091	0.000126834
0.09695	22.7337	0.00605	0.000341224	0.00605	0.00031879	0.00605	0.000296482	0.00605	0.000262891	0.00605	0.000234238	0.00605	0.000221515	0.00605	0.000205657	0.00605	0.000180874	0.00605	0.000156723	0.00605	0.000125798
0.1121	22.7268	0.0212	0.000339023	0.0212	0.000317278	0.0212	0.000294071	0.0212	0.000260732	0.0212	0.000234036	0.0212	0.000218838	0.0212	0.000204289	0.0212	0.000178575	0.0212	0.00015464	0.0212	0.000122797
0.12725	22.7197	0.03635	0.000337706	0.03635	0.000316199	0.03635	0.000293003	0.03635	0.000260744	0.03635	0.000234046	0.03635	0.000217374	0.03635	0.000203304	0.03635	0.000176905	0.03635	0.000152868	0.03635	0.000121119
0.1424	22.7132	0.0515	0.000336722	0.0515	0.000315297	0.0515	0.000292174	0.0515	0.000259901	0.0515	0.000230016	0.0515	0.000215653	0.0515	0.000201455	0.0515	0.000175511	0.0515	0.000151604	0.0515	0.000119864
0.1576	22.7073	0.06665	0.000335809	0.06665	0.000314416	0.06665	0.000291402	0.06665	0.000259831	0.06665	0.000229682	0.06665	0.000214066	0.06665	0.000201738	0.06665	0.000174366	0.06665	0.00015053	0.06665	0.000118849
0.17275	22.7018	0.0818	0.000334945	0.0818	0.000313652	0.0818	0.000290706	0.0818	0.000259772	0.0818	0.000229329	0.0818	0.000212885	0.0818	0.000201087	0.0818	0.00017326	0.0818	0.000149598	0.0818	0.000118004
0.1879	22.6967	0.09695	0.000334226	0.09695	0.00031296	0.09695	0.000290113	0.09695	0.000259714	0.09695	0.000229051	0.09695	0.00021208	0.09695	0.000200541	0.09695	0.000172342	0.09695	0.000148818	0.09695	0.00011726
0.20305	22.6911	0.1121	0.000333516	0.1121	0.00031229	0.1121	0.000289543	0.1121	0.000259664	0.1121	0.000228725	0.1121	0.000210942	0.1121	0.00019965	0.1121	0.00017154	0.1121	0.000148085	0.1121	0.000115661
0.2182	22.686	0.12725	0.000332866	0.12725	0.000311669	0.12725	0.000289022	0.12725	0.000259612	0.12725	0.00022844	0.12725	0.000210962	0.12725	0.00019671	0.12725	0.000170753	0.12725	0.000137425	0.12725	0.000110053
0.23335	22.6838	0.1424	0.000332251	0.1424	0.000311111	0.1424	0.000288539	0.1424	0.000259564	0.1424	0.000228169	0.1424	0.000209602	0.1424	0.00019403	0.1424	0.000170018	0.1424	0.00013682	0.1424	0.00010851
0.2485	22.6761	0.1576	0.00033164	0.1576	0.00031061	0.1576	0.000288075	0.1576	0.00025877	0.1576	0.000227933	0.1576	0.000207755	0.1576	0.000192617	0.1576	0.000166386	0.1576	0.000136239	0.1576	0.0001025
0.26365	22.6049	0.17275	0.00033106	0.17275	0.000310072	0.17275	0.000287638	0.17275	0.00025549	0.17275	0.000227735	0.17275	0.000207734	0.17275	0.000190821	0.17275	0.000164752	0.17275	0.000135714	0.17275	0.000100458
0.2788	22.4805	0.1879	0.000330542	0.1879	0.000309587	0.1879	0.000287228	0.1879	0.00025054	0.1879	0.000225751	0.1879	0.000206531	0.1879	0.000188782	0.1879	0.00016217	0.1879	0.000131522	0.1879	9.90841e-05
0.29395	22.4761	0.20305	0.000329997	0.20305	0.000309076	0.20305	0.000286806	0.20305	0.00024584	0.20305	0.000220725	0.20305	0.00020155	0.20305	0.000186745	0.20305	0.000160648	0.20305	0.000128477	0.20305	9.93709e-05
0.3091	22.5255	0.2182	0.000329833	0.2182	0.000308643	0.2182	0.000286417	0.2182	0.00024258	0.2182	0.000218704	0.2182	0.00019848	0.2182	0.000184708	0.2182	0.000158155	0.2182	0.000126431	0.2182	9.83326e-05
0.32425	22.4876	0.23335	0.00032897	0.23335	0.00030824	0.23335	0.000286063	0.23335	0.00024054	0.23335	0.000216686	0.23335	0.00019659	0.23335	0.000182678	0.23335	0.00015684	0.23335	0.000124388	0.23335	9.82296e-05
0.3394	22.451	0.2485	0.00032854	0.2485	0.000307812	0.2485	0.000285646	0.2485	0.000239298	0.2485	0.000214664	0.2485	0.000194386	0.2485	0.00018064	0.2485	0.00015434	0.2485	0.00012347	0.2485	9.80262e-05
0.35455	22.3441	0.26365	0.000328023	0.26365	0.00030741	0.26365	0.000285282	0.26365	0.000236263	0.26365	0.000212642	0.26365	0.000192307	0.26365	0.000178607	0.26365	0.00015225	0.26365	0.000120309	0.26365	9.02281e-05
0.3697	22.3093	0.2788	0.000327528	0.2788	0.000307014	0.2788	0.000284951	0.2788	0.000234229	0.2788	0.00021062	0.2788	0.000190319	0.2788	0.000176573	0.2788	0.00015011	0.2788	0.000118273	0.2788	8.81969e-05
0.38485	22.2406	0.29395	0.000326969	0.29395	0.000306631	0.29395	0.000274569	0.29395	0.000232198	0.29395	0.000208598	0.29395	0.000189247	0.29395	0.000174544	0.29395	0.00015027	0.29395	0.000116242	0.29395	8.50705e-05
0.4	22.237	0.3091	0.000326478	0.3091	0.00030626	0.3091	0.000274176	0.3091	0.00023016	0.3091	0.000206583	0.3091	0.000186894	0.3091	0.00017251	0.3091	0.00014896	0.3091	0.000114206	0.3091	8.42394e-05
0.41515	22.0082	0.32425	0.000325959	0.32425	0.00030592	0.32425	0.000273779	0.32425	0.000228128	0.32425	0.000204563	0.32425	0.000184657	0.32425	0.000170479	0.32425	0.00014616	0.32425	0.000112174	0.32425	8.23107e-05
0.4303	21.5607	0.3394	0.000324953	0.3394	0.000305622	0.3394	0.000273411	0.3394	0.000226096	0.3394	0.000202545	0.3394	0.000182908	0.3394	0.000168453	0.3394	0.00014231	0.3394	0.000110144	0.3394	8.13687e-05
0.44545	21.5418	0.35455	0.000324309	0.35455	0.000305278	0.35455	0.000273033	0.35455	0.00022407	0.35455	0.000200531	0.35455	0.000180927	0.35455	0.00016642	0.35455	0.00013866	0.35455	0.000108118	0.35455	8.12594e-05
0.4606	21.5434	0.3697	0.000322896	0.3697	0.00030494	0.3697	0.000272711	0.3697	0.000222039	0.3697	0.000196513	0.3697	0.000178815	0.3697	0.000164392	0.3697	0.00013455	0.3697	0.000106089	0.3697	8.1042e-05
0.47575	21.4795	0.38485	0.000322267	0.38485	0.0003046	0.38485	0.000267392	0.38485	0.000220096	0.38485	0.000194944	0.38485	0.000178408	0.38485	0.000161363	0.38485	0.000131387	0.38485	0.000104061	0.38485	8.08109e-05
0.4909	21.4475	0.4	0.000321149	0.4	0.000303293	0.4	0.000267075	0.4	0.00021823	0.4	0.000192478	0.4	0.000176822	0.4	0.000156339	0.4	0.000122267	0.4	0.00010204	0.4	8.05227e-05
0.50605	21.4163	0.41515	0.000318564	0.41515	0.000302391	0.41515	0.000262726	0.41515	0.000216498	0.41515	0.000190465	0.41515	0.000174807	0.41515	0.00015131	0.41515	0.00012346	0.41515	0.000100013	0.41515	8.00064e-05
0.5212	21.3875	0.4303	0.000317496	0.4303	0.000301355	0.4303	0.000260414	0.4303	0.000214201	0.4303	0.000188447	0.4303	0.000172782	0.4303	0.000146285	0.4303	0.00012006	0.4303	9.82398e-05	0.4303	8.00089e-05
0.53635	21.3554	0.44545	0.000317243	0.44545	0.000295321	0.44545	0.000256089	0.44545	0.000212889	0.44545	0.000186431	0.44545	0.000170771	0.44545	0.000142261	0.44545	0.00011787	0.44545	9.60684e-05	0.44545	7.89287e-05
0.5515	21.325	0.4606	0.000316942	0.4606	0.000293289	0.4606	0.00025278	0.4606	0.000210859	0.4606	0.000182417	0.4606	0.000167741	0.4606	0.000138239	0.4606	0.00011374	0.4606	9.4099e-05	0.4606	7.8289e-05
0.56665	21.2262	0.47575	0.000315048	0.47575	0.000291258	0.47575	0.00024877	0.47575	0.000208279	0.47575	0.000180397	0.47575	0.000165694	0.47575	0.000135217	0.47575	0.00010902	0.47575	9.20409e-05	0.47575	7.644e-05
0.5818	21.158	0.4909	0.000313982	0.4909	0.00028923	0.4909	0.00024446	0.4909	0.000208014	0.4909	0.000178379	0.4909	0.00016166	0.4909	0.000131199	0.4909	0.00010823	0.4909	9.0158e-05	0.4909	7.597e-05
0.59695	21.0091	0.50605	0.000312071	0.50605	0.000287198	0.50605	0.0002411	0.50605	0.000205743	0.50605	0.000176363	0.50605	0.00016195	0.50605	0.000128174	0.50605	0.00010573	0.50605	8.8484e-05	0.50605	7.586e-05
0.6121	20.8038	0.5212	0.000311055	0.5212	0.000284165	0.5212	0.000240948	0.5212	0.000202501	0.5212	0.000174345	0.5212	0.00015663	0.5212	0.000124152	0.5212	0.0001043	0.5212	8.6266e-05	0.5212	7.5642e-05
0.62725	20.6375	0.53635	0.000310385	0.53635	0.000281135	0.53635	0.000238918	0.53635	0.000200278	0.53635	0.00017233	0.53635	0.00015204	0.53635	0.000121319	0.53635	0.00010158	0.53635	8.40988e-05	0.53635	7.557e-05
0.6424	20.4743	0.5515	0.000309359	0.5515	0.0002781	0.5515	0.000230882	0.5515	0.000194699	0.5515	0.000170309	0.5515	0.00014941	0.5515	0.00011524	0.5515	0.000101591	0.5515	8.20419e-05	0.5515	7.541e-05
0.6576	20.0828	0.56665	0.000308149	0.56665	0.000274066	0.56665	0.000230502	0.56665	0.00019018	0.56665	0.000168286	0.56665	0.00014161	0.56665	0.00010928	0.56665	0.0001036	0.56665	8.063e-05	0.56665	7.498e-05
0.67275	19.3792	0.5818	0.000307068	0.5818	0.000271036	0.5818	0.000229002	0.5818	0.000185444	0.5818	0.000166268	0.5818	0.00014041	0.5818	0.00010729	0.5818	0.00010192	0.5818	7.829e-05	0.5818	7.423e-05
0.6879	19.3171	0.59695	0.00030401	0.59695	0.000267003	0.59695	0.000219032	0.59695	0.000185179	0.59695	0.000164249	0.59695	0.00013424	0.59695	0.0001053	0.59695	0.00011039	0.59695	7.699e-05	0.59695	7.184e-05
0.70305	18.4159	0.6121	0.000301964	0.6121	0.000263969	0.6121	0.000209792	0.6121	0.000182908	0.6121	0.000162233	0.6121	0.00013488	0.6121	0.0001032	0.6121	0.0001023	0.6121	7.468e-05	0.6121	6.898e-05
0.7182	18.0505	0.62725	0.00030092	0.62725	0.000260937	0.62725	0.000204061	0.62725	0.000180565	0.62725	0.000160216	0.62725	0.00012526	0.62725	0.00010109	0.62725	0.0001009	0.62725	7.305e-05	0.62725	6.827e-05
0.73335	17.7495	0.6424	0.000295879	0.6424	0.000255905	0.6424	0.000200924	0.6424	0.000178539	0.6424	0.000156198	0.6424	0.0001258	0.6424	0.00010378	0.6424	9.8e-05	0.6424	7.029e-05	0.6424	6.612e-05
0.7485	17.1226	0.6576	0.000291839	0.6576	0.000250897	0.6576	0.000196689	0.6576	0.00017451	0.6576	0.0001522	0.6576	0.00012087	0.6576	0.00010773	0.6576	9.68e-05	0.6576	6.765e-05	0.6576	6.416e-05
0.76365	16.2118	0.67275	0.000287712	0.67275	0.000245847	0.67275	0.000182804	0.67275	0.000172834	0.67275	0.000150167	0.67275	0.00011766	0.67275	0.00010102	0.67275	9.27e-05	0.67275	6.58e-05	0.67275	6.177e-05
0.7788	14.9992	0.6879	0.00027576	0.6879	0.000240811	0.6879	0.00018125	0.6879	0.000168486	0.6879	0.000148145	0.6879	0.0001141	0.6879	0.00010149	0.6879	9.04e-05	0.6879	6.338e-05	0.6879	5.965e-05
0.79395	14.5404	0.70305	0.000270721	0.70305	0.000235776	0.70305	0.00017549	0.70305	0.000164429	0.70305	0.000146121	0.70305	0.00011127	0.70305	9.8185e-05	0.70305	8.693e-05	0.70305	6.145e-05	0.70305	5.732e-05
0.8091	13.9656	0.7182	0.000265743	0.7182	0.000230741	0.7182	0.00016635	0.7182	0.000158405	0.7182	0.000144099	0.7182	0.00010464	0.7182	9.6024e-05	0.7182	8.074e-05	0.7182	4.947e-05	0.7182	5.538e-05
0.82425	13.2774	0.73335	0.000260646	0.73335	0.000217043	0.73335	0.00015854	0.73335	0.000154373	0.73335	0.000142079	0.73335	0.00010388	0.73335	9.5039e-05	0.73335	6.741e-05	0.73335	5.688e-05	0.73335	5.315e-05
0.8394	12.4811	0.7485	0.000245976	0.7485	0.00020713	0.7485	0.00014985	0.7485	0.000150342	0.7485	0.000140054	0.7485	0.00010093	0.7485	9.3176e-05	0.7485	6.561e-05	0.7485	5.503e-05	0.7485	5.093e-05
0.85455	11.3915	0.76365	0.000225341	0.76365	0.00020063	0.76365	0.00014632	0.76365	0.000143072	0.76365	0.000138032	0.76365	0.00010004	0.76365	9.153e-05	0.76365	5.97e-05	0.76365	4.763e-05	0.76365	4.868e-05
0.8697	9.96771	0.7788	0.000215148	0.7788	0.00018591	0.7788	0.00014299	0.7788	0.000132748	0.7788	0.000134009	0.7788	0.00010198	0.7788	8.883e-05	0.7788	4.762e-05	0.7788	3.849e-05	0.7788	4.639e-05
0.88485	8.06513	0.79395	0.000204608	0.79395	0.00017396	0.79395	0.00013858	0.79395	0.0001233	0.79395	0.000130176	0.79395	9.829e-05	0.79395	8.19e-05	0.79395	4.628e-05	0.79395	3.984e-05	0.79395	4.39e-05
0.9	6.24124	0.8091	0.000193399	0.8091	0.00015854	0.8091	0.00013374	0.8091	0.00011876	0.8091	0.000120047	0.8091	8.958e-05	0.8091	7.42e-05	0.8091	4.489e-05	0.8091	3.468e-05	0.8091	4.137e-05
0.91515	2.68215	0.82425	0.000183295	0.82425	0.0001424	0.82425	0.00012848	0.82425	0.00011364	0.82425	0.00011404	0.82425	8.642e-05	0.82425	6.766e-05	0.82425	4.11e-05	0.82425	3.1e-05	0.82425	3.819e-05
0.9303	-1.32841	0.8394	0.000172365	0.8394	0.00013405	0.8394	0.00012122	0.8394	0.00010696	0.8394	0.0001124	0.8394	7.602e-05	0.8394	6.131e-05	0.8394	3.581e-05	0.8394	3.068e-05	0.8394	3.449e-05
		0.85455	0.000151243	0.85455	0.00012323	0.85455	0.00011235	0.85455	0.00011293	0.85455	0.00010831	0.85455	6.561e-05	0.85455	5.581e-05	0.85455	2.939e-05	0.85455	2.959e-05	0.85455	3.012e-05
		0.8697	0.000121157	0.8697	0.00010957	0.8697	0.00010075	0.8697	9.994e-05	0.8697	9.757e-05	0.8697	5.399e-05	0.8697	4.539e-05	0.8697	2.138e-05	0.8697	2.9516e-05	0.8697	2.434e-05
		0.88485	9.934e-05	0.88485	9.843e-05	0.88485	9.36e-05	0.88485	7.779e-05	0.88485	7.833e-05	0.88485	4.036e-05	0.88485	3.082e-05	0.88485	2.112e-05	0.88485	2.355e-05	0.88485	1.695e-05
		0.9	6.867e-05	0.9	6.914e-05	0.9	6.852e-05	0.9	5.585e-05	0.9	6.065e-05	0.9	2.303e-05	0.9	1.282e-05	0.9	1.708e-05	0.9	1.36e-05	0.9	1.565e-05
		0.91515	3.719e-05	0.91515	3.693e-05	0.91515	4.195e-05	0.91515	2.915e-05	0.91515	3.968e-05	0.91515	5.71e-06	0.91515	-4.21e-06	0.91515	2.16e-06	0.91515	4.34e-06	0.91515	1.71e-06
		0.9303	-4.9e-06	0.9303	1.27e-06	0.9303	1.64e-05	0.9303	-1e-07	0.9303	1.277e-05	0.9303	-1.919e-05	0.9303	-3.998e-05	0.9303	-1.651e-05	0.9303	-1.052e-05	0.9303	-1.421e-05
		0.94545	-4.629e-05	0.94545	-4.37e-05	0.94545	-2.755e-05	0.94545	-4.076e-05	0.94545	-2.075e-05	0.94545	-5.51e-05	0.94545	-7.492e-05	0.94545	-4.717e-05	0.94545	-3.427e-05	0.94545	-3.813e-05
		0.9606	-9.753e-05	0.9606	-9.935e-05	0.9606	-7.572e-05	0.9606	-9.108e-05	0.9606	-6.217e-05	0.9606	-9.422e-05	0.9606	-0.00012154	0.9606	-8.157e-05	0.9606	-6.104e-05	0.9606	-6.477e-05
		0.97575	-0.00015376	0.97575	-0.0001654	0.97575	-0.00015451	0.97575	-0.00015009	0.97575	-0.00010967	0.97575	-0.0001508	0.97575	-0.0001662	0.97575	-0.00011748	0.97575	-9.234e-05	0.97575	-9.601e-05
		0.9909	-0.00021575	0.9909	-0.0002311	0.9909	-0.00022108	0.9909	-0.00021458	0.9909	-0.00016869	0.9909	-0.00018193	0.9909	-0.00021574	0.9909	-0.00016361	0.9909	-0.00012848	0.9909	-0.00013231
		1.00605	-0.00028305	1.00605	-0.00030541	1.00605	-0.00027909	1.00605	-0.00028538	1.00605	-0.00023417	1.00605	-0.00025697	1.00605	-0.00026895	1.00605	-0.00021386	1.00605	-0.00017044	1.00605	-0.00017448
		1.0212	-0.00035726	1.0212	-0.000385	1.0212	-0.00036051	1.0212	-0.0003632	1.0212	-0.00030598	1.0212	-0.00033201	1.0212	-0.00033057	1.0212	-0.00028222	1.0212	-0.00021774	1.0212	-0.00022095
		1.03635	-0.00043895	1.03635	-0.00047004	1.03635	-0.00051867	1.03635	-0.00044897	1.03635	-0.00038419	1.03635	-0.00035771	1.03635	-0.00039351	1.03635	-0.0003423	1.03635	-0.00026996	1.03635	-0.00027162
		1.0515	-0.00052852	1.0515	-0.0005608	1.0515	-0.00053566	1.0515	-0.0005444	1.0515	-0.00046957	1.0515	-0.00043994	1.0515	-0.00046853	1.0515	-0.00040538	1.0515	-0.0003277	1.0515	-0.00032792
		1.06665	-0.00062698	1.06665	-0.00066325	1.06665	-0.00063994	1.06665	-0.00064936	1.06665	-0.00056568	1.06665	-0.00050131	1.06665	-0.00054371	1.06665	-0.00047781	1.06665	-0.00039091	1.06665	-0.0003894
		1.0818	-0.00073557	1.0818	-0.00077219	1.0818	-0.00074848	1.0818	-0.0007655	1.0818	-0.00067164	1.0818	-0.00061171	1.0818	-0.0006334	1.0818	-0.00055444	1.0818	-0.00046013	1.0818	-0.00045591
		1.09695	-0.00085544	1.09695	-0.00088925	1.09695	-0.00087112	1.09695	-0.00088951	1.09695	-0.00078732	1.09695	-0.00067749	1.09695	-0.0007117	1.09695	-0.00066477	1.09695	-0.00053465	1.09695	-0.00052746
		1.1121	-0.00098564	1.1121	-0.00101	1.1121	-0.00099756	1.1121	-0.00103	1.1121	-0.0009098	1.1121	-0.00077634	1.1121	-0.00081143	1.1121	-0.00075049	1.1121	-0.00061466	1.1121	-0.00060419
		1.12725	-0.00115	1.12725	-0.00116	1.12725	-0.00116	1.12725	-0.00121	1.12725	-0.00109	1.12725	-0.00089128	1.12725	-0.00091625	1.12725	-0.00082303	1.12725	-0.00070109	1.12725	-0.0006864
		1.1424	-0.0013	1.1424	-0.00129	1.1424	-0.00131	1.1424	-0.00135	1.1424	-0.0012	1.1424	-0.00102	1.1424	-0.00103	1.1424	-0.0009293	1.1424	-0.00079389	1.1424	-0.0007741
		1.1576	-0.00145	1.1576	-0.00143	1.1576	-0.00147	1.1576	-0.00151	1.1576	-0.00134	1.1576	-0.00116	1.1576	-0.00118	1.1576	-0.00107	1.1576	-0.0008935	1.1576	-0.00086854
		1.17275	-0.00162	1.17275	-0.00156	1.17275	-0.00163	1.17275	-0.00167	1.17275	-0.00147	1.17275	-0.00126	1.17275	-0.0013	1.17275	-0.00118	1.17275	-0.00099783	1.17275	-0.00096795
		1.1879	-0.00179	1.1879	-0.0017	1.1879	-0.00179	1.1879	-0.00184	1.1879	-0.00162	1.1879	-0.00139	1.1879	-0.00142	1.1879	-0.0013	1.1879	-0.00113	1.1879	-0.00112
		1.20305	-0.00197	1.20305	-0.00184	1.20305	-0.00195	1.20305	-0.002	1.20305	-0.00178	1.20305	-0.00152	1.20305	-0.00156	1.20305	-0.00143	1.20305	-0.00124	1.20305	-0.0012
		1.2182	-0.00214	1.2182	-0.00196	1.2182	-0.00211	1.2182	-0.00216	1.2182	-0.00187	1.2182	-0.00166	1.2182	-0.0017	1.2182	-0.00156	1.2182	-0.00136	1.2182	-0.00131
		1.23335	-0.00232	1.23335	-0.00208	1.23335	-0.00226	1.23335	-0.00231	1.23335	-0.00199	1.23335	-0.00181	1.23335	-0.00184	1.23335	-0.0017	1.23335	-0.00148	1.23335	-0.00143
		1.2485	-0.00248	1.2485	-0.00219	1.2485	-0.0024	1.2485	-0.00245	1.2485	-0.00211	1.2485	-0.00198	1.2485	-0.00198	1.2485	-0.00183	1.2485	-0.0016	1.2485	-0.00154
		1.26365	-0.00265	1.26365	-0.00229	1.26365	-0.00254	1.26365	-0.00259	1.26365	-0.00221	1.26365	-0.00212	1.26365	-0.00213	1.26365	-0.00197	1.26365	-0.00172	1.26365	-0.00166
		1.2788	-0.0028	1.2788	-0.00238	1.2788	-0.00266	1.2788	-0.00271	1.2788	-0.00232	1.2788	-0.00226	1.2788	-0.00228	1.2788	-0.00211	1.2788	-0.00185	1.2788	-0.00178
		1.29395	-0.00295	1.29395	-0.00245	1.29395	-0.00277	1.29395	-0.00282	1.29395	-0.0024	1.29395	-0.00239	1.29395	-0.00241	1.29395	-0.00224	1.29395	-0.00197	1.29395	-0.0019
		1.3091	-0.00309	1.3091	-0.00253	1.3091	-0.00286	1.3091	-0.00292	1.3091	-0.00246	1.3091	-0.00253	1.3091	-0.00256	1.3091	-0.00238	1.3091	-0.00208	1.3091	-0.00202
		1.32425	-0.00321	1.32425	-0.00261	1.32425	-0.00296	1.32425	-0.00302	1.32425	-0.00251	1.32425	-0.00266	1.32425	-0.0027	1.32425	-0.00251	1.32425	-0.0022	1.32425	-0.00213
		1.3394	-0.00334	1.3394	-0.0027	1.3394	-0.00305	1.3394	-0.00311	1.3394	-0.00256	1.3394	-0.00278	1.3394	-0.00282	1.3394	-0.00263	1.3394	-0.00231	1.3394	-0.00224
		1.35455	-0.00344	1.35455	-0.0027	1.35455	-0.00312	1.35455	-0.00319	1.35455	-0.00261	1.35455	-0.0029	1.35455	-0.00295	1.35455	-0.00275	1.35455	-0.0024	1.35455	-0.00234
		1.3697	-0.00355	1.3697	-0.00275	1.3697	-0.0032	1.3697	-0.00326	1.3697	-0.00266	1.3697	-0.00303	1.3697	-0.00307	1.3697	-0.00286	1.3697	-0.00249	1.3697	-0.00244
		1.38485	-0.00364	1.38485	-0.0028	1.38485	-0.00326	1.38485	-0.00333	1.38485	-0.00271	1.38485	-0.00313	1.38485	-0.00319	1.38485	-0.00296	1.38485	-0.00257	1.38485	-0.00256
		1.4	-0.00373	1.4	-0.00284	1.4	-0.00333	1.4	-0.0034	1.4	-0.00274	1.4	-0.00323	1.4	-0.00328	1.4	-0.00306	1.4	-0.00265	1.4	-0.0026

## Sheet: Sample 3 JV Data
	0 Strain		1.0% Strain		1.5% Strain		2.0% Strain		2.5% Strain		3.0% Strain		3.5% Strain		4.0% Strain		4.5% Strain		5.0% Strain		5.5% Strain
V	J	V	J	V	J	V	J	V	J	V	J	V	J	V	J	V	J	V	J	V	J
-0.0091	26.6793	-0.1	0.00070452	-0.1	0.00071298	-0.1	0.00063501	-0.1	0.00072945	-0.1	0.00084092	-0.1	0.00081419	-0.1	0.00079852	-0.1	0.00081616	-0.1	0.00081856	-0.1	0.00034199
0.00605	26.6793	-0.08485	0.00058702	-0.08485	0.00057868	-0.08485	0.00052097	-0.08485	0.00061442	-0.08485	0.00073156	-0.08485	0.00070243	-0.08485	0.00066782	-0.08485	0.00069692	-0.08485	0.00069932	-0.08485	0.00024996
0.0212	26.6793	-0.0697	0.00052502	-0.0697	0.00050931	-0.0697	0.00046134	-0.0697	0.00055394	-0.0697	0.00059145	-0.0697	0.0005678	-0.0697	0.00053272	-0.0697	0.00055206	-0.0697	0.00056003	-0.0697	0.00020486
0.03635	26.6793	-0.05455	0.00048505	-0.05455	0.00046572	-0.05455	0.00042368	-0.05455	0.00051486	-0.05455	0.00048355	-0.05455	0.00046336	-0.05455	0.00043641	-0.05455	0.00044092	-0.05455	0.00045186	-0.05455	0.00017783
0.0515	26.6793	-0.0394	0.0004577	-0.0394	0.00043549	-0.0394	0.00039728	-0.0394	0.00048693	-0.0394	0.00041417	-0.0394	0.00039049	-0.0394	0.00037113	-0.0394	0.00036406	-0.0394	0.00037486	-0.0394	0.00015944
0.06665	26.6793	-0.02425	0.00043647	-0.02425	0.00041218	-0.02425	0.00037588	-0.02425	0.00046475	-0.02425	0.00036891	-0.02425	0.0003399	-0.02425	0.00032569	-0.02425	0.00031143	-0.02425	0.00032047	-0.02425	0.00014577
0.0818	26.6793	-0.0091	0.00027952	-0.0091	0.000270327	-0.0091	0.000258591	-0.0091	0.000258562	-0.0091	0.00022744	-0.0091	0.00020374	-0.0091	0.000159326	-0.0091	0.000117442	-0.0091	0.000108109	-0.0091	7.05e-05
0.09695	26.6793	0.00605	0.000279508	0.00605	0.000270999	0.00605	0.000258493	0.00605	0.000258035	0.00605	0.000225178	0.00605	0.00018822	0.00605	0.000157103	0.00605	0.000116496	0.00605	0.000106144	0.00605	6.933e-05
0.1121	26.6793	0.0212	0.000279313	0.0212	0.000270685	0.0212	0.00025833	0.0212	0.000258075	0.0212	0.000224968	0.0212	0.000185844	0.0212	0.00015655	0.0212	0.000116275	0.0212	0.000103069	0.0212	6.8661e-05
0.12725	26.6793	0.03635	0.000278104	0.03635	0.000270539	0.03635	0.000258022	0.03635	0.000258162	0.03635	0.000224825	0.03635	0.000184052	0.03635	0.000156034	0.03635	0.000115112	0.03635	0.000101091	0.03635	6.8497e-05
0.1424	26.6793	0.0515	0.00027807	0.0515	0.000270433	0.0515	0.000260199	0.0515	0.000258077	0.0515	0.000224708	0.0515	0.000182667	0.0515	0.000155821	0.0515	0.000114978	0.0515	0.000101459	0.0515	6.82696e-05
0.1576	26.6793	0.06665	0.000277861	0.06665	0.000270324	0.06665	0.000259035	0.06665	0.000257821	0.06665	0.000224611	0.06665	0.000181537	0.06665	0.000155106	0.06665	0.00011487	0.06665	0.000101815	0.06665	6.8068e-05
0.17275	26.6793	0.0818	0.000277553	0.0818	0.000269234	0.0818	0.000258956	0.0818	0.000257135	0.0818	0.000224226	0.0818	0.000180564	0.0818	0.000152014	0.0818	0.000114772	0.0818	0.000101704	0.0818	6.80892e-05
0.1879	26.6793	0.09695	0.000277245	0.09695	0.000269151	0.09695	0.000258593	0.09695	0.000256258	0.09695	0.00022365	0.09695	0.00018017	0.09695	0.000150931	0.09695	0.000113692	0.09695	0.00010161	0.09695	6.8073e-05
0.20305	26.6793	0.1121	0.000277039	0.1121	0.000269067	0.1121	0.00025802	0.1121	0.000256052	0.1121	0.000223333	0.1121	0.000180179	0.1121	0.000150489	0.1121	0.000113614	0.1121	0.000101523	0.1121	6.796e-05
0.2182	26.6793	0.12725	0.000276832	0.12725	0.00026899	0.12725	0.000257626	0.12725	0.000255437	0.12725	0.00022317	0.12725	0.000180174	0.12725	0.000150468	0.12725	0.000113549	0.12725	0.000101446	0.12725	6.7908e-05
0.23335	26.6793	0.1424	0.000276625	0.1424	0.000268918	0.1424	0.000256947	0.1424	0.00025535	0.1424	0.0002206	0.1424	0.000179676	0.1424	0.000150045	0.1424	0.000113485	0.1424	0.000101376	0.1424	6.794e-05
0.2485	26.6793	0.1576	0.000276418	0.1576	0.000268849	0.1576	0.000256342	0.1576	0.00025526	0.1576	0.000218071	0.1576	0.00017867	0.1576	0.000150407	0.1576	0.000113428	0.1576	0.000101313	0.1576	6.7823e-05
0.26365	26.6793	0.17275	0.000276313	0.17275	0.000267826	0.17275	0.00025675	0.17275	0.000254571	0.17275	0.000216153	0.17275	0.000176413	0.17275	0.000150366	0.17275	0.00011338	0.17275	0.000101256	0.17275	6.7777e-05
0.2788	26.6793	0.1879	0.000276207	0.1879	0.000267279	0.1879	0.000256522	0.1879	0.000252418	0.1879	0.000215106	0.1879	0.00017589	0.1879	0.000149326	0.1879	0.00011333	0.1879	0.000100705	0.1879	6.7605e-05
0.29395	26.6793	0.20305	0.000276	0.20305	0.00026664	0.20305	0.000256474	0.20305	0.00025136	0.20305	0.000214064	0.20305	0.000175391	0.20305	0.000149305	0.20305	0.000112828	0.20305	0.000100554	0.20305	6.7298e-05
0.3091	26.6793	0.2182	0.000275796	0.2182	0.000263608	0.2182	0.000256425	0.2182	0.000251463	0.2182	0.000213019	0.2182	0.000174922	0.2182	0.000149275	0.2182	0.000112245	0.2182	0.000100106	0.2182	6.7008e-05
0.32425	26.6793	0.23335	0.000275589	0.23335	0.000262551	0.23335	0.000256383	0.23335	0.000251423	0.23335	0.000211298	0.23335	0.00017452	0.23335	0.000149244	0.23335	0.00011202	0.23335	0.000100654	0.23335	6.6583e-05
0.3394	26.6793	0.2485	0.000275384	0.2485	0.000261494	0.2485	0.000256329	0.2485	0.000251402	0.2485	0.000210943	0.2485	0.000174068	0.2485	0.000148204	0.2485	0.000111636	0.2485	9.85222e-05	0.2485	6.633e-05
0.35455	26.6793	0.26365	0.00027518	0.26365	0.000261446	0.26365	0.000256279	0.26365	0.000250362	0.26365	0.000208081	0.26365	0.00017364	0.26365	0.000148163	0.26365	0.000111257	0.26365	9.65251e-05	0.26365	6.528e-05
0.3697	26.6793	0.2788	0.000269497	0.2788	0.000261382	0.2788	0.000256223	0.2788	0.000250312	0.2788	0.00020737	0.2788	0.000173263	0.2788	0.000147123	0.2788	0.000110904	0.2788	9.4573e-05	0.2788	6.427e-05
0.38485	26.6793	0.29395	0.000268477	0.29395	0.000261328	0.29395	0.000256177	0.29395	0.000249251	0.29395	0.000205841	0.29395	0.000172845	0.29395	0.000146103	0.29395	0.000110525	0.29395	9.2125e-05	0.29395	6.3233e-05
0.4	26.6793	0.3091	0.000267456	0.3091	0.000261275	0.3091	0.000256129	0.3091	0.000249201	0.3091	0.000203089	0.3091	0.000172446	0.3091	0.000146082	0.3091	0.000110188	0.3091	9.13043e-05	0.3091	6.211e-05
0.41515	26.6793	0.32425	0.000266436	0.32425	0.000260231	0.32425	0.000256071	0.32425	0.000248064	0.32425	0.000201784	0.32425	0.000172078	0.32425	0.000145042	0.32425	0.000108058	0.32425	9.1047e-05	0.32425	6.1033e-05
0.4303	26.6793	0.3394	0.000265415	0.3394	0.000260177	0.3394	0.000256022	0.3394	0.000248033	0.3394	0.000198511	0.3394	0.000171751	0.3394	0.000144002	0.3394	0.00010606	0.3394	9.057e-05	0.3394	6.0079e-05
0.44545	26.6793	0.35455	0.000264385	0.35455	0.000260126	0.35455	0.000255982	0.35455	0.000247002	0.35455	0.000198723	0.35455	0.000171381	0.35455	0.000143217	0.35455	0.00010461	0.35455	9.0085e-05	0.35455	5.8053e-05
0.4606	26.6793	0.3697	0.000263364	0.3697	0.000260082	0.3697	0.0002534	0.3697	0.000246638	0.3697	0.000196932	0.3697	0.000171043	0.3697	0.000142091	0.3697	0.00010225	0.3697	8.616e-05	0.3697	5.407e-05
0.47575	26.6548	0.38485	0.000262346	0.38485	0.000259028	0.38485	0.000253931	0.38485	0.000244007	0.38485	0.000196635	0.38485	0.000168075	0.38485	0.00014015	0.38485	0.00010097	0.38485	8.239e-05	0.38485	5.2039e-05
0.4909	26.5466	0.4	0.000261323	0.4	0.000258779	0.4	0.000252212	0.4	0.000242576	0.4	0.000186382	0.4	0.00016504	0.4	0.000138328	0.4	9.8937e-05	0.4	8.002e-05	0.4	5.008e-05
0.50605	26.5441	0.41515	0.000260271	0.41515	0.000258312	0.41515	0.000252176	0.41515	0.000241008	0.41515	0.00018607	0.41515	0.000164011	0.41515	0.000135056	0.41515	9.5676e-05	0.41515	7.5276e-05	0.41515	4.627e-05
0.5212	26.5396	0.4303	0.000259216	0.4303	0.000257754	0.4303	0.000251732	0.4303	0.000238824	0.4303	0.000175774	0.4303	0.000163009	0.4303	0.00013062	0.4303	9.1225e-05	0.4303	7.13391e-05	0.4303	4.303e-05
0.53635	26.5337	0.44545	0.000258164	0.44545	0.000257246	0.44545	0.00025169	0.44545	0.000234411	0.44545	0.000172547	0.44545	0.000162647	0.44545	0.000128454	0.44545	8.89655e-05	0.44545	6.85153e-05	0.44545	4.0137e-05
0.5515	26.5281	0.4606	0.000256114	0.4606	0.00025678	0.4606	0.000251627	0.4606	0.000230443	0.4606	0.000170516	0.4606	0.000160497	0.4606	0.000125262	0.4606	8.52362e-05	0.4606	6.752e-05	0.4606	3.5041e-05
0.56665	26.4267	0.47575	0.000254075	0.47575	0.00025539	0.47575	0.000248593	0.47575	0.000226622	0.47575	0.000168488	0.47575	0.000158207	0.47575	0.000122	0.47575	8.02057e-05	0.47575	6.5294e-05	0.47575	3.208e-05
0.5818	26.3253	0.4909	0.000252021	0.4909	0.000254691	0.4909	0.000246429	0.4909	0.000220795	0.4909	0.000165454	0.4909	0.00015401	0.4909	0.00012	0.4909	7.8979e-05	0.4909	6.458e-05	0.4909	2.711e-05
0.59695	26.2235	0.50605	0.000250534	0.50605	0.000253487	0.50605	0.000244821	0.50605	0.000216669	0.50605	0.000161424	0.50605	0.00015092	0.50605	0.0001164	0.50605	7.5723e-05	0.50605	6.2244e-05	0.50605	2.559e-05
0.6121	26.1227	0.5212	0.000248236	0.5212	0.000252391	0.5212	0.000242121	0.5212	0.000213884	0.5212	0.000158402	0.5212	0.00014697	0.5212	0.0001126	0.5212	7.2328e-05	0.5212	6.139e-05	0.5212	2.118e-05
0.62725	25.9253	0.53635	0.000246713	0.53635	0.000251645	0.53635	0.000240014	0.53635	0.000210535	0.53635	0.000152367	0.53635	0.0001422	0.53635	0.000108189	0.53635	7.0205e-05	0.53635	6.0045e-05	0.53635	1.885e-05
0.6424	25.7311	0.5515	0.000244873	0.5515	0.00025186	0.5515	0.000238852	0.5515	0.00020872	0.5515	0.00014634	0.5515	0.00013869	0.5515	0.000104864	0.5515	7.007e-05	0.5515	5.8962e-05	0.5515	1.713e-05
0.6576	25.4336	0.56665	0.000240775	0.56665	0.00025052	0.56665	0.000231702	0.56665	0.00020187	0.56665	0.000141313	0.56665	0.00013421	0.56665	0.00010257	0.56665	6.852e-05	0.56665	5.6506e-05	0.56665	1.534e-05
0.67275	25.1393	0.5818	0.000236868	0.5818	0.000250436	0.5818	0.000225491	0.5818	0.000196903	0.5818	0.000138284	0.5818	0.000130776	0.5818	9.825e-05	0.5818	6.507e-05	0.5818	5.12347e-05	0.5818	1.442e-05
0.6879	24.7066	0.59695	0.000232427	0.59695	0.000249388	0.59695	0.000220109	0.59695	0.000190839	0.59695	0.00013126	0.59695	0.0001254	0.59695	9.0048e-05	0.59695	6e-05	0.59695	5.0049e-05	0.59695	1.049e-05
0.70305	24.1728	0.6121	0.000228278	0.6121	0.000246338	0.6121	0.000215069	0.6121	0.00018023	0.6121	0.000128232	0.6121	0.00012001	0.6121	8.4284e-05	0.6121	5.853e-05	0.6121	4.89992e-05	0.6121	1.416e-05
0.7182	23.7448	0.62725	0.00022221	0.62725	0.000243084	0.62725	0.000210814	0.62725	0.000175	0.62725	0.00012048	0.62725	0.0001158	0.62725	8.0159e-05	0.62725	5.1249e-05	0.62725	4.6569e-05	0.62725	9.7e-06
0.73335	23.2152	0.6424	0.000216847	0.6424	0.000240766	0.6424	0.00020563	0.6424	0.000170884	0.6424	0.00011792	0.6424	0.00011125	0.6424	7.5138e-05	0.6424	4.673e-05	0.6424	4.2026e-05	0.6424	2.18e-06
0.7485	22.7785	0.6576	0.000210667	0.6576	0.00023512	0.6576	0.00020005	0.6576	0.000165019	0.6576	0.00011515	0.6576	0.00010525	0.6576	7.237e-05	0.6576	4.488e-05	0.6576	4.00572e-05	0.6576	-3.7e-07
0.76365	22.2641	0.67275	0.000204327	0.67275	0.0002303	0.67275	0.000195157	0.67275	0.00016081	0.67275	0.0001126	0.67275	9.44e-05	0.67275	7.031e-05	0.67275	4.308e-05	0.67275	3.7937e-05	0.67275	-3.61e-06
0.7788	21.3106	0.6879	0.000196032	0.6879	0.000226732	0.6879	0.000190027	0.6879	0.00015169	0.6879	0.00010983	0.6879	9.109e-05	0.6879	6.001e-05	0.6879	4.118e-05	0.6879	3.0096e-05	0.6879	-7.08e-06
0.79395	20.3894	0.70305	0.000190265	0.70305	0.000220005	0.70305	0.000185134	0.70305	0.00014253	0.70305	9.9849e-05	0.70305	8.6553e-05	0.70305	5.5505e-05	0.70305	3.946e-05	0.70305	2.897e-05	0.70305	-9.35e-06
0.8091	19.3567	0.7182	0.000182206	0.7182	0.000214852	0.7182	0.000180205	0.7182	0.00013009	0.7182	9.624e-05	0.7182	8.0295e-05	0.7182	5.0283e-05	0.7182	3.773e-05	0.7182	2.566e-05	0.7182	-1.05e-05
0.82425	18.4479	0.73335	0.000175773	0.73335	0.000205554	0.73335	0.000172243	0.73335	0.00012404	0.73335	9.4157e-05	0.73335	7.505e-05	0.73335	5.0071e-05	0.73335	3.614e-05	0.73335	2.2077e-05	0.73335	-6.616e-05
0.8394	17.6173	0.7485	0.000165159	0.7485	0.000196488	0.7485	0.00016573	0.7485	0.00011603	0.7485	9.1093e-05	0.7485	7.0816e-05	0.7485	4.87e-05	0.7485	3.424e-05	0.7485	2.008e-05	0.7485	-6.843e-05
0.85455	16.4639	0.76365	0.000152079	0.76365	0.000190232	0.76365	0.000159584	0.76365	0.00010554	0.76365	8.6864e-05	0.76365	6.558e-05	0.76365	4.594e-05	0.76365	3.261e-05	0.76365	1.502e-05	0.76365	-7.331e-05
0.8697	15.5007	0.7788	0.000135388	0.7788	0.000182172	0.7788	0.000150577	0.7788	9.0169e-05	0.7788	8.29e-05	0.7788	5.5349e-05	0.7788	4.356e-05	0.7788	3.108e-05	0.7788	1.001e-05	0.7788	-7.562e-05
0.88485	14.534	0.79395	0.000132078	0.79395	0.00016831	0.79395	0.000140614	0.79395	8.16e-05	0.79395	8.0174e-05	0.79395	4.9099e-05	0.79395	4.059e-05	0.79395	2.929e-05	0.79395	5.2e-06	0.79395	-7.922e-05
0.9	11.6141	0.8091	0.00012066	0.8091	0.0001524	0.8091	0.0001285	0.8091	7.5309e-05	0.8091	7.554e-05	0.8091	4.0829e-05	0.8091	3.772e-05	0.8091	2.729e-05	0.8091	0	0.8091	-8.093e-05
0.91515	9.48499	0.82425	0.00011215	0.82425	0.00012837	0.82425	0.0001057	0.82425	6.4587e-05	0.82425	7.10789e-05	0.82425	3.531e-05	0.82425	3.483e-05	0.82425	2.534e-05	0.82425	-2.51e-06	0.82425	-7.994e-05
0.93	5	0.8394	0.000100235	0.8394	0.00010571	0.8394	8.67e-05	0.8394	5.544e-05	0.8394	6.8571e-05	0.8394	3.177e-05	0.8394	3.111e-05	0.8394	2.292e-05	0.8394	-8.88e-06	0.8394	-8.2e-05
0.94	0	0.85455	9.588e-05	0.85455	9.083e-05	0.85455	6.5513e-05	0.85455	2.04e-05	0.85455	6.0201e-05	0.85455	2.736e-05	0.85455	2.68e-05	0.85455	2.009e-05	0.85455	-1.93e-05	0.85455	-8.152e-05
		0.8697	9.056e-05	0.8697	4.67e-05	0.8697	4.049e-05	0.8697	0	0.8697	5.202e-05	0.8697	2.205e-05	0.8697	2.131e-05	0.8697	1.635e-05	0.8697	-3.293e-05	0.8697	-8.279e-05
		0.88485	8.28e-05	0.88485	2.07e-05	0.88485	2.08e-05	0.88485	-4.5464e-05	0.88485	4.402e-05	0.88485	1.556e-05	0.88485	1.462e-05	0.88485	1.058e-05	0.88485	-4.935e-05	0.88485	-8.093e-05
		0.9	5.287e-05	0.9	1.044e-05	0.9	1.01e-05	0.9	-4.021e-05	0.9	2.774e-05	0.9	1.226e-05	0.9	8.23e-06	0.9	7.49e-06	0.9	-6.698e-05	0.9	-8.63e-05
		0.91515	-1.879e-05	0.91515	-2.852e-05	0.91515	-7.1e-07	0.91515	-0.00058735	0.91515	1.478e-05	0.91515	-1.55e-06	0.91515	-4.49e-06	0.91515	-1.06e-06	0.91515	-9.116e-05	0.91515	-8.978e-05
		0.9303	-5.341e-05	0.9303	-6.838e-05	0.9303	-3.183e-05	0.9303	-0.00062095	0.9303	-1.219e-05	0.9303	-1.398e-05	0.9303	-1.566e-05	0.9303	-8.41e-06	0.9303	-0.00012268	0.9303	-8.129e-05
		0.94545	-9.756e-05	0.94545	-0.00024436	0.94545	-7.801e-05	0.94545	-0.00066715	0.94545	-4.007e-05	0.94545	-3.387e-05	0.94545	-3.408e-05	0.94545	-2.195e-05	0.94545	-0.0001502	0.94545	-8.546e-05
		0.9606	-0.00021641	0.9606	-0.00029867	0.9606	-0.00014116	0.9606	-0.00071684	0.9606	-7.062e-05	0.9606	-5.541e-05	0.9606	-5.436e-05	0.9606	-3.972e-05	0.9606	-0.00018339	0.9606	-9.762e-05
		0.97575	-0.00028334	0.97575	-0.00035838	0.97575	-0.00020225	0.97575	-0.00080595	0.97575	-0.00010426	0.97575	-7.85e-05	0.97575	-7.741e-05	0.97575	-5.385e-05	0.97575	-0.00021927	0.97575	-7.998e-05
		0.9909	-0.00035571	0.9909	-0.00042705	0.9909	-0.00027064	0.9909	-0.00098771	0.9909	-0.00014516	0.9909	-0.00010618	0.9909	-0.00010377	0.9909	-7.439e-05	0.9909	-0.00026034	0.9909	-9.213e-05
		1.00605	-0.00043302	1.00605	-0.00050154	1.00605	-0.0003462	1.00605	-0.00127	1.00605	-0.00019257	1.00605	-0.00014183	1.00605	-0.00013648	1.00605	-9.811e-05	1.00605	-0.00030962	1.00605	-0.00010486
		1.0212	-0.00051819	1.0212	-0.00058767	1.0212	-0.00042997	1.0212	-0.00136	1.0212	-0.00023305	1.0212	-0.00017254	1.0212	-0.00016972	1.0212	-0.00013608	1.0212	-0.00035888	1.0212	-0.00012851
		1.03635	-0.00061345	1.03635	-0.00067976	1.03635	-0.00052299	1.03635	-0.00145	1.03635	-0.00031489	1.03635	-0.00020994	1.03635	-0.00020673	1.03635	-0.00016547	1.03635	-0.00041605	1.03635	-0.00015595
		1.0515	-0.00071922	1.0515	-0.00078488	1.0515	-0.00062653	1.0515	-0.00156	1.0515	-0.0003632	1.0515	-0.00025047	1.0515	-0.000248	1.0515	-0.00019972	1.0515	-0.00048085	1.0515	-0.0001866
		1.06665	-0.00083417	1.06665	-0.00090096	1.06665	-0.00074226	1.06665	-0.00168	1.06665	-0.00040925	1.06665	-0.0002959	1.06665	-0.00029331	1.06665	-0.00023534	1.06665	-0.00055283	1.06665	-0.00021845
		1.0818	-0.00096328	1.0818	-0.00104	1.0818	-0.00087073	1.0818	-0.00181	1.0818	-0.00047315	1.0818	-0.00034874	1.0818	-0.00034443	1.0818	-0.00027906	1.0818	-0.00063226	1.0818	-0.00025899
		1.09695	-0.00114	1.09695	-0.00128	1.09695	-0.00101	1.09695	-0.00196	1.09695	-0.00053339	1.09695	-0.00040487	1.09695	-0.00040044	1.09695	-0.00032823	1.09695	-0.00071995	1.09695	-0.0002952
		1.1121	-0.0013	1.1121	-0.00144	1.1121	-0.00123	1.1121	-0.00213	1.1121	-0.00059398	1.1121	-0.00046611	1.1121	-0.0004633	1.1121	-0.00038221	1.1121	-0.00081581	1.1121	-0.00034435
		1.12725	-0.00146	1.12725	-0.00161	1.12725	-0.00139	1.12725	-0.00231	1.12725	-0.00067651	1.12725	-0.00053643	1.12725	-0.00053277	1.12725	-0.00044213	1.12725	-0.00092519	1.12725	-0.000398
		1.1424	-0.00164	1.1424	-0.0018	1.1424	-0.00158	1.1424	-0.0025	1.1424	-0.00076408	1.1424	-0.00061515	1.1424	-0.00060996	1.1424	-0.00051085	1.1424	-0.00112	1.1424	-0.00045878
		1.1576	-0.00183	1.1576	-0.002	1.1576	-0.00178	1.1576	-0.00272	1.1576	-0.00085259	1.1576	-0.00070246	1.1576	-0.00069676	1.1576	-0.00058541	1.1576	-0.00123	1.1576	-0.00052534
		1.17275	-0.00204	1.17275	-0.00224	1.17275	-0.00201	1.17275	-0.00295	1.17275	-0.00095792	1.17275	-0.00079888	1.17275	-0.00079176	1.17275	-0.00066856	1.17275	-0.00135	1.17275	-0.00059885
		1.1879	-0.00226	1.1879	-0.00249	1.1879	-0.00225	1.1879	-0.00322	1.1879	-0.00144	1.1879	-0.00090292	1.1879	-0.00089613	1.1879	-0.00076067	1.1879	-0.0015	1.1879	-0.00067935
		1.20305	-0.00249	1.20305	-0.00276	1.20305	-0.0025	1.20305	-0.00349	1.20305	-0.0017	1.20305	-0.00102	1.20305	-0.00101	1.20305	-0.00087713	1.20305	-0.00164	1.20305	-0.00076833
		1.2182	-0.00275	1.2182	-0.00305	1.2182	-0.00278	1.2182	-0.00379	1.2182	-0.00205	1.2182	-0.0012	1.2182	-0.00119	1.2182	-0.00099887	1.2182	-0.00178	1.2182	-0.00086471
		1.23335	-0.00301	1.23335	-0.00336	1.23335	-0.00308	1.23335	-0.00411	1.23335	-0.0025	1.23335	-0.00131	1.23335	-0.00131	1.23335	-0.0012	1.23335	-0.00193	1.23335	-0.00096831
		1.2485	-0.00326	1.2485	-0.00368	1.2485	-0.0034	1.2485	-0.00444	1.2485	-0.00245	1.2485	-0.00145	1.2485	-0.00144	1.2485	-0.0013	1.2485	-0.00207	1.2485	-0.00116
		1.26365	-0.00351	1.26365	-0.00401	1.26365	-0.00374	1.26365	-0.00479	1.26365	-0.00247	1.26365	-0.0016	1.26365	-0.00158	1.26365	-0.00142	1.26365	-0.00222	1.26365	-0.00127
		1.2788	-0.00376	1.2788	-0.00436	1.2788	-0.00407	1.2788	-0.0051	1.2788	-0.00431	1.2788	-0.00175	1.2788	-0.00174	1.2788	-0.00155	1.2788	-0.00237	1.2788	-0.00139
		1.29395	-0.00402	1.29395	-0.00472	1.29395	-0.00441	1.29395	-0.00545	1.29395	-0.00415	1.29395	-0.00192	1.29395	-0.0019	1.29395	-0.0017	1.29395	-0.00251	1.29395	-0.00152
		1.3091	-0.00425	1.3091	-0.00509	1.3091	-0.00476	1.3091	-0.00579	1.3091	-0.0047	1.3091	-0.0021	1.3091	-0.00206	1.3091	-0.00183	1.3091	-0.00265	1.3091	-0.00165
		1.32425	-0.00449	1.32425	-0.00545	1.32425	-0.00511	1.32425	-0.00612	1.32425	-0.0045	1.32425	-0.00226	1.32425	-0.00222	1.32425	-0.00197	1.32425		1.32425	-0.00179
		1.3394	-0.00473	1.3394	-0.00581	1.3394	-0.00545	1.3394	-0.00646	1.3394	-0.00368	1.3394	-0.00244	1.3394	-0.00239	1.3394	-0.00211	1.3394		1.3394	-0.00193
		1.35455	-0.00496	1.35455	-0.0062	1.35455	-0.00578	1.35455	-0.00678	1.35455	-0.00366	1.35455	-0.00259	1.35455	-0.00256	1.35455	-0.00226	1.35455		1.35455	-0.00207
		1.3697	-0.00515	1.3697	-0.00657	1.3697	-0.0061	1.3697	-0.00708	1.3697	-0.00367	1.3697	-0.00276	1.3697	-0.00272	1.3697	-0.00239	1.3697		1.3697	-0.0022
		1.38485	-0.00534	1.38485	-0.00693	1.38485	-0.00644	1.38485	-0.00738	1.38485	-0.00339	1.38485	-0.0029	1.38485	-0.00289	1.38485	-0.00252	1.38485		1.38485	-0.00233
		1.4	-0.00554	1.4	-0.00726	1.4	-0.00673	1.4	-0.00768	1.4	-0.00335	1.4	-0.00306	1.4	-0.00305	1.4	-0.00264	1.4		1.4	-0.00245
