# Supplementary material for: Mechanism and regulation of tensile-induced degradation of flexible perovskite solar cells
Source: Royal Society of Chemistry journal article supplement (doi:10.1039/d4ya00086b), 2024-01-01
Supplement: d4ya00086b4.xlsx [file d4ya00086b4.xlsx]

## Sheet: Sheet1
Experiment							Simulation
1.2	-38.3884	-40.0418	-44.4231	-31.2681	-79.4394	-24.5105	0	20.2884	19.1941	16.8546	15.732	12.7524	10.2396
1.18685	-35.2079	-38.7773	-43.0646	-30.3606	-76.0143	-24.6203	0.05	20.1581	19.0671	16.7431	15.6278	12.6679	10.1716
1.17375	-31.9807	-36.9113	-40.976	-28.9271	-72.2222	-23.9641	0.1	20.0208	18.9332	16.6254	15.5181	12.5788	10.1
1.1606	-29.346	-34.6922	-38.4446	-27.219	-71.4378	-21.6294	0.15	19.8759	18.7917	16.5011	15.4021	12.4846	10.0243
1.1475	-26.2591	-32.2936	-35.6483	-25.3326	-71.8498	-19.7277	0.2	19.7222	18.6416	16.3693	15.2791	12.3848	9.94395
1.13435	-24.019	-29.7464	-32.6752	-23.3479	-68.0114	-18.0429	0.25	19.5588	18.4819	16.229	15.1482	12.2785	9.85843
1.1212	-21.8666	-27.1229	-29.6527	-21.3431	-63.8684	-16.6221	0.3	19.3845	18.3113	16.0791	15.0084	12.1649	9.76703
1.1081	-20.0072	-24.4649	-26.5754	-19.2619	-63.7392	-14.4099	0.35	19.1975	18.1283	15.9183	14.8584	12.043	9.66894
1.09495	-17.8057	-21.8378	-23.6	-17.2146	-60.0047	-12.7344	0.4	18.9962	17.9311	15.745	14.6967	11.9116	9.56317
1.0818	-15.5103	-19.2827	-20.6548	-15.2027	-49.7174	-11.1992	0.45	18.7783	17.7175	15.5573	14.5215	11.7693	9.44858
1.0687	-13.6422	-16.7673	-17.9296	-13.2178	-57.5774	-9.54918	0.5	18.5412	17.4848	15.3528	14.3308	11.6143	9.3237
1.05555	-10.8892	-14.2318	-15.1952	-11.2781	-49.1641	-8.64169	0.55	18.2814	17.2298	15.1287	14.1217	11.4443	9.18668
1.0424	-8.5891	-18.3147	-12.6656	-9.41213	-57.5016	-6.98965	0.6	17.9943	16.9478	14.8808	13.8905	11.2561	9.03487
1.0293	-6.41204	-9.57311	-10.301	-7.63388	-41.4222	-5.97572	0.65	17.6732	16.6323	14.6031	13.6314	11.0448	8.86406
1.01615	-4.3732	-7.28311	-8.09875	-5.95913	-51.0476	-5.19586	0.7	17.3059	16.2712	14.2847	13.3341	10.8011	8.6656
1.00305	-2.45527	-5.08311	-6.05542	-4.377	-46.8082	-3.97694	0.75	16.8649	15.8375	13.8998	12.9741	10.5017	8.41746
0.9899	-0.52152	-3.30556	-4.15979	-2.88019	-43.7176	-3.35548	0.8	16.2764	15.2586	13.3789	12.4843	10.0825	8.05796
0.97675	1.3754	-1.24867	-2.42229	-1.61794	-9.12863	-3.29591	0.85	15.3275	14.327	12.523	11.6736	9.36024	7.41156
0.96365	2.86044	0.53356	-1.01021	-0.26213	-50.2208	-1.9344	0.9	13.3913	12.4385	10.7535	9.98721	7.80457	5.97101
0.9505	4.32705	2.02467	0.59167	0.94669	-49.3078	-27.5788	0.95	8.54416	7.77597	6.33284	5.76085	3.82542	2.21638
0.93735	6.20774	3.26689	2.00396	1.96913	-45.9886	-0.2832	1	-5.38056	-5.31578	-6.14346	-6.17541	-7.51512	-8.57037
0.92425	7.63902	4.72267	2.96604	2.80256	-0.08951	-0.08951
0.9111	8.46907	5.98022	4.285	3.81075	0.81374	0.81374
0.898	9.57169	7.12378	5.42896	4.68225	1.23558	1.23558
0.88485	10.5677	8.12178	6.47292	5.46131	1.18221	1.18221
0.8717	11.486	9.02978	7.39792	6.15225	1.83247	1.83247
0.8586	12.1106	9.66644	8.26354	6.76856	2.13961	2.19219
0.84545	12.8772	10.5116	9.0475	7.28138	2.54843	2.0016
0.8323	13.1412	11.1869	9.73542	7.80769	2.90059	2.45845
0.8192	13.3783	11.7727	10.3846	8.20069	3.22902	2.75972
0.80605	14.1303	12.2693	10.9537	8.66606	3.50294	2.92292
0.79295	14.8722	12.7484	11.4462	9.03675	3.80745	3.02456
0.7798	14.9786	13.1416	11.9	9.35531	3.84235	3.28687
0.76665	15.539	13.508	12.2912	9.66263	3.89451	3.48649
0.75355	15.8439	13.7996	12.6163	9.93019	4.08081	3.66325
0.7404	15.9824	14.0791	12.929	10.1642	4.24137	3.74927
0.72725	15.9976	14.3193	13.2035	10.4047	4.57745	4.12856
0.71415	16.0327	14.5382	13.4275	10.6217	4.87196	4.31915
0.701	16.3345	14.7198	13.62	10.8171	5.12706	4.50381
0.6879	16.3882	14.8738	13.8108	11.0029	5.39529	4.69016
0.67475	16.6723	15.0571	13.9838	11.1733	5.63784	4.87115
0.6616	16.8632	15.2193	14.1273	11.3481	5.85647	5.05016
0.6485	16.8075	15.3696	14.2602	11.4999	6.08529	5.21901
0.63535	17.0163	15.5189	14.3858	11.6509	6.3049	5.38955
0.6222	17.1762	15.6267	14.5204	11.8033	6.52078	5.55586
0.6091	17.3918	15.7244	14.6294	11.9404	6.72804	5.7216
0.59595	17.4729	15.8698	14.7329	12.0804	6.93	5.87548
0.58285	17.5205	15.9629	14.8279	12.1971	7.12882	6.03868
0.5697	17.5953	16.0809	14.9398	12.3435	7.31157	6.18805
0.55655	17.6605	16.1898	15.0415	12.4719	7.51412	6.34532
0.54345	17.6631	16.3093	15.1119	12.5874	7.70451	6.48932
0.5303	17.7961	16.4071	15.231	12.7059	7.87706	6.64913
0.51715	17.904	16.4922	15.3265	12.8061	8.07098	6.79087
0.50405	17.9454	16.6073	15.405	12.9214	8.25216	6.94645
0.4909	18.0041	16.6731	15.496	13.0254	8.4251	7.07915
0.4778	18.0694	16.7613	15.58	13.1364	8.59706	7.22654
0.46465	18.1859	16.8467	15.6552	13.2386	8.76745	7.36433
0.4515	18.2134	16.9147	15.7402	13.3344	8.93451	7.48602
0.4384	18.2997	17.0178	15.7948	13.4278	9.09745	7.62664
0.42525	18.4106	17.0696	15.8856	13.524	9.24255	7.76075
0.4121	18.4726	17.1633	15.9637	13.5947	9.41529	7.88132
0.399	18.5625	17.24	16.0148	13.6822	9.57353	8.01007
0.38585	18.6108	17.3144	16.106	13.7711	9.70981	8.13628
0.37275	18.6758	17.3533	16.1715	13.8557	9.86824	8.2608
0.3596	18.7766	17.4436	16.2312	13.9373	10.0231	8.36584
0.34645	18.8604	17.5291	16.304	14.0031	10.1561	8.48809
0.33335	18.7564	17.5849	16.3487	14.0799	10.3016	8.60527
0.3202	18.9217	17.6236	16.4237	14.1352	10.4382	8.72414
0.30705	19.0608	17.6853	16.491	14.2277	10.5839	8.83595
0.29395	19.0723	17.754	16.5454	14.3046	10.7147	8.94071
0.2808	19.1668	17.8187	16.6062	14.3531	10.8314	9.04828
0.2677	19.2309	17.852	16.6708	14.4309	10.9684	9.15445
0.25455	19.2493	17.9104	16.7179	14.4971	11.0957	9.24
0.2414	19.3225	17.9513	16.7579	14.547	11.2174	9.35125
0.2283	19.3449	18.0204	16.8219	14.6222	11.3435	9.45007
0.21515	19.4047	18.0638	16.8477	14.6814	11.4604	9.55031
0.202	19.4545	18.1116	16.9213	14.7429	11.5606	9.64264
0.1889	19.4866	18.1693	16.9829	14.8129	11.678	9.73186
0.17575	19.5425	18.2013	17.03	14.853	11.7845	9.83746
0.16265	19.5791	18.2751	17.0892	14.9235	11.918	9.67953
0.1495	19.5929	18.3184	17.1535	14.9816	12.0151	10.0049
0.13635	19.6421	18.3633	17.1919	15.0253	12.1418	10.1128
0.12325	19.6616	18.4111	17.2454	15.0922	12.2539	10.191
0.1101	19.7095	18.45	17.296	15.1356	12.3594	10.2935
0.09695	19.7568	18.4791	17.3223	15.2053	12.4586	10.3751
0.08385	19.7817	18.5438	17.3773	15.2479	12.5441	10.4739
0.0707	19.807	18.5864	17.4327	15.3075	12.6667	10.5747
0.0576	19.862	18.6349	17.471	15.3478	12.772	10.6526
0.04445	19.9026	18.6822	17.5177	15.3999	12.8708	10.7463
0.0313	19.9405	18.7269	17.5673	15.4616	12.951	10.8339
0.0182	19.934	18.7616	17.6054	15.5158	13.0639	11.2941
0.00505	19.992	18.8036	17.6375	15.5456	13.1629	11.2941
-0.0081	20.4403	18.88	17.9977	15.8779	13.4302	8.61349
-0.0212	20.1348	18.898	17.7838	15.7033	13.3514	8.65255
-0.03435	20.1481	18.9296	17.8165	15.7333	13.4702	8.66557
-0.04745	20.161	18.9733	17.851	15.762	13.5672	8.79357
-0.0606	20.1894	19.028	17.9092	15.8252	13.6692	8.90965
-0.07375	20.2274	19.0764	17.9829	15.8897	13.7753	9.01004
-0.08685	20.2798	19.1347	18.0421	15.9351	13.8894	9.14134
-0.1	20.3192	19.1704	18.0944	16.0037	15.3563	9.27843

## Sheet: Sheet2
Experiment							Simulation
1.2	-50.0208	-50.33	-48.9132	-36.7863	-39.8257	-21.3734	0	20.2884	19.1941	16.8546	15.732	12.7524	10.2396
1.18685	-47.9768	-49.5138	-46.8807	-35.1854	-37.7518	-20.3402	0.05	20.1581	19.0671	16.7431	15.6278	12.6679	10.1716
1.17375	-49.8934	-47.6747	-44.2793	-33.0428	-35.4669	-18.9539	0.1	20.0208	18.9332	16.6254	15.5181	12.5788	10.1
1.1606	-42.457	-44.7974	-41.068	-30.4191	-33.3464	-16.9024	0.15	19.8759	18.7917	16.5011	15.4021	12.4846	10.0243
1.1475	-39.2422	-41.568	-37.6113	-28.292	-34.121	-15.1146	0.2	19.7222	18.6416	16.3693	15.2791	12.3848	9.94395
1.13435	-35.7808	-37.8344	-34.081	-26.5721	-27.8409	-13.2916	0.25	19.5588	18.4819	16.229	15.1482	12.2785	9.85843
1.1212	-32.5677	-34.3909	-30.5437	-22.4216	-27.5655	-11.8512	0.3	19.3845	18.3113	16.0791	15.0084	12.1649	9.76703
1.1081	-29.4642	-30.799	-40.9611	-19.9106	-27.6222	-10.1435	0.35	19.1975	18.1283	15.9183	14.8584	12.043	9.66894
1.09495	-26.0312	-27.0786	-24.5598	-17.4376	-21.4593	-8.72687	0.4	18.9962	17.9311	15.745	14.6967	11.9116	9.56317
1.0818	-23.1918	-23.6147	-20.6005	-15.1984	-18.4536	-7.42192	0.45	18.7783	17.7175	15.5573	14.5215	11.7693	9.44858
1.0687	-19.427	-20.2559	-17.7648	-13.2396	-23.9556	-6.16415	0.5	18.5412	17.4848	15.3528	14.3308	11.6143	9.3237
1.05555	-16.3006	-17.2441	-15.1046	-11.0753	-23.3439	-5.29905	0.55	18.2814	17.2298	15.1287	14.1217	11.4443	9.18668
1.0424	-13.3808	-15.52	-12.5819	-11.6066	-24.6255	-4.21478	0.6	17.9943	16.9478	14.8808	13.8905	11.2561	9.03487
1.0293	-10.7038	-11.3562	-10.2699	-7.72814	-19.9645	-3.43932	0.65	17.6732	16.6323	14.6031	13.6314	11.0448	8.86406
1.01615	-8.19303	-8.72388	-8.27665	-6.16797	-21.4359	-2.80898	0.7	17.3059	16.2712	14.2847	13.3341	10.8011	8.6656
1.00305	-6.94418	-6.42955	-6.36891	-4.83737	-19.4915	-2.0457	0.75	16.8649	15.8375	13.8998	12.9741	10.5017	8.41746
0.9899	-3.13564	-4.39754	-4.5665	-3.94654	-17.9764	-1.6351	0.8	16.2764	15.2586	13.3789	12.4843	10.0825	8.05796
0.97675	-0.98115	-2.3995	-2.97972	-2.25827	-10.7442	-1.46873	0.85	15.3275	14.327	12.523	11.6736	9.36024	7.41156
0.96365	0.98444	-0.75033	-1.68475	-1.17187	-17.472	-0.76432	0.9	13.3913	12.4385	10.7535	9.98721	7.80457	5.97101
0.9505	2.72749	0.70914	-0.44621	-0.28539	-9.71076	-11.5462	0.95	8.54416	7.77597	6.33284	5.76085	3.82542	2.21638
0.93735	4.39218	2.06422	0.63433	-0.30965	-8.53847	0.16142	1	-5.38056	-5.31578	-6.14346	-6.17541	-7.51512	-8.57037
0.92425	5.8827	3.15018	1.61078	1.33331	0.55225	0.33314
0.9111	7.09443	4.30448	2.52473	2.04425	-0.8227	0.80155
0.898	8.32438	5.22034	3.33196	2.64558	-5.27286	1.05848
0.88485	9.40202	6.60186	4.17343	3.22425	1.78783	1.2839
0.8717	10.3112	7.4692	4.6249	3.82366	2.14261	1.64357
0.8586	11.1672	8.19138	5.60172	4.28149	2.49173	1.87599
0.84545	11.9084	8.82859	6.24609	4.72658	2.87488	1.87021
0.8323	12.5516	9.57149	6.76868	4.97178	3.1104	2.14471
0.8192	13.0442	10.162	7.21417	5.48483	3.43988	2.35237
0.80605	13.5813	10.6311	7.85761	5.89675	3.67668	2.51836
0.79295	14.077	11.1105	8.26987	6.25589	3.89264	2.65575
0.7798	14.5286	11.512	8.72844	6.54796	4.15083	2.89221
0.76665	15.0224	11.8842	9.04576	6.87608	4.30523	3.06201
0.75355	15.3628	12.2132	9.40571	7.15148	4.57207	3.2068
0.7404	15.6343	12.5274	9.74013	7.43884	4.77077	3.2844
0.72725	15.8638	12.7921	10.0344	7.60623	5.02948	3.54054
0.71415	15.9698	13.057	10.3046	7.96557	5.24901	3.71561
0.701	16.301	13.2893	10.5484	8.198	5.41684	3.90171
0.6879	16.4855	13.5063	10.6464	8.42264	5.72231	4.07619
0.67475	16.7011	13.6919	11.0016	8.58048	5.83506	4.24895
0.6616	16.8977	13.891	11.2056	8.84283	6.03869	4.42032
0.6485	17.0245	14.0636	11.4053	8.96208	6.26125	4.58101
0.63535	17.2074	14.2438	11.5975	9.12342	6.46651	4.63493
0.6222	17.3664	14.4133	11.7783	9.35131	6.69179	4.90736
0.6091	17.5507	14.5471	11.9481	9.52436	6.83781	5.0747
0.59595	17.6743	14.7141	12.1034	9.68167	7.07938	5.22694
0.58285	17.8085	14.8462	12.2628	9.76834	7.2172	5.38892
0.5697	17.9868	14.9967	12.3941	9.98165	7.47636	5.54532
0.55655	18.0545	15.1367	12.5648	10.2023	7.61585	5.69825
0.54345	18.1565	15.2676	12.7005	10.3624	7.86714	5.852
0.5303	18.2798	15.3992	12.855	10.5092	7.98996	6.00728
0.51715	18.398	15.5189	13	10.6686	8.25296	6.16113
0.50405	18.4968	15.6402	13.1312	10.836	8.36572	6.31584
0.4909	18.6049	15.7659	13.2656	11.0171	8.57738	6.46338
0.4778	18.701	15.8684	13.3886	11.1188	8.61009	6.61381
0.46465	18.8041	15.9864	13.5174	11.3032	8.74369	6.75816
0.4515	18.8717	16.0935	13.6413	11.4507	8.83337	6.89534
0.4384	18.9107	16.2037	13.7622	11.5733	9.00665	7.04816
0.42525	19.0253	16.2935	13.878	11.6702	9.23817	7.18066
0.4121	19.136	16.3979	13.9894	11.7756	9.36376	7.32324
0.399	19.2294	16.4898	14.0977	11.8932	9.54739	7.45903
0.38585	19.2967	16.5838	14.2135	12.0993	9.75587	7.60016
0.37275	19.361	16.6684	14.3156	12.2253	9.86052	7.74031
0.3596	19.449	16.766	14.4214	12.3492	10.0902	7.85645
0.34645	19.5548	16.8575	14.5223	12.4581	10.2315	7.99708
0.33335	19.6011	16.9354	14.6227	12.5736	10.3837	8.12281
0.3202	19.7151	17.027	14.7186	12.6839	10.5483	8.25156
0.30705	19.8024	17.1046	14.8114	12.8019	10.684	8.38489
0.29395	19.8797	17.1891	14.905	12.9024	10.8325	8.50395
0.2808	19.9557	17.2661	14.9916	13.0153	10.8978	8.62532
0.2677	20.0252	17.3458	15.0867	13.124	11.0787	8.74517
0.25455	20.089	17.4209	15.165	13.215	11.1756	8.85391
0.2414	20.1648	17.4939	15.2505	13.317	11.352	8.97633
0.2283	20.2284	17.5727	15.3338	13.4218	11.4392	9.09233
0.21515	20.292	17.642	15.4103	13.5181	11.5582	9.20484
0.202	20.3591	17.7124	15.4903	13.6145	11.6753	9.3206
0.1889	20.4214	17.7894	15.5743	13.7138	11.7893	9.41448
0.17575	20.4822	17.8448	15.6444	13.7997	11.8935	9.53584
0.16265	20.5473	17.9236	15.7145	13.8991	12.0159	9.53349
0.1495	20.5943	17.9894	15.7957	13.9806	12.1193	9.7405
0.13635	20.6604	18.0538	15.8626	14.0792	12.2539	9.85613
0.12325	20.7033	18.1164	15.9307	14.1596	12.4087	9.95557
0.1101	20.7648	18.1727	16.0046	14.2404	12.4348	10.0558
0.09695	20.8221	18.2284	16.0724	14.3402	12.5697	10.1609
0.08385	20.8725	18.2975	16.1411	14.4143	12.6906	10.2698
0.0707	20.9244	18.3464	16.2139	14.4956	12.7908	10.3788
0.0576	20.9799	18.415	16.2656	14.5678	12.9705	10.4737
0.04445	21.0303	18.4687	16.3322	14.6527	13.0291	10.5707
0.0313	21.0822	18.531	16.3993	14.7351	13.1544	10.6768
0.0182	21.122	18.5832	16.4497	14.7912	13.2163	10.9697
0.00505	21.1883	18.6474	16.4748	14.8018	13.2404	11.0154
-0.0081	17.9143	15.4071	13.3162	11.7033	10.4582	7.94453
-0.0212	17.6926	15.3503	9.90229	-135.248	-113.512	5.39114
-0.03435	17.7155	15.3792	9.92447	-222.901	-201.006	5.42776
-0.04745	17.7435	15.4199	9.95387	-310.217	-287.989	5.50097
-0.0606	17.7757	15.4684	9.98133	-397.86	-375.441	5.57035
-0.07375	17.8234	15.5176	10.0196	-485.507	-462.74	5.62869
-0.08685	17.8699	15.5603	10.0542	-572.819	-549.708	5.70226
-0.1	17.9136	15.6127	10.0946	-660.459	-636.655	5.78188

## Sheet: Sheet3
Experiment												Simulation
Scan Voltage	0	0.1	0.2	0.3	0.4	0.5	0.6	0.7	0.8	0.9
Strain	J	J	J	J	J	J	J	J	J	J		Scan Voltage	0	0.1	0.2	0.3	0.4	0.6
0	20.2884	20.0208	19.7222	19.3845	18.9962	18.5412	17.9943	17.3059	16.2764	13.3913		Strain	J	J	J	J	J	J
0.5	19.1478	18.8977	18.6168	18.2968	17.9259	17.4875	16.9559	16.2816	15.2681	12.4413		0	21.1883	20.7648	20.3591	19.8024	19.2294	17.5507
1	16.8138	16.5941	16.3474	16.0662	15.7404	15.3551	14.8878	14.2938	13.3872	10.7555		0.5	18.6474	18.1727	17.7124	17.1046	16.4898	14.5471
1.5	15.6937	15.4887	15.2585	14.9962	14.6922	14.3329	13.897	13.3426	12.492	9.98893		1	16.4748	16.0046	15.4903	14.8114	14.0977	11.9481
2	12.7213	12.5549	12.3679	12.1549	11.908	11.6159	11.2613	10.8079	10.0886	7.8052		1.5	14.8018	14.2404	13.6145	12.8019	11.8932	9.52436
2.5	10.2145	10.0807	9.93031	9.7589	9.56014	9.32493	9.039	8.67104	8.06277	5.97073		2	13.2404	12.4348	11.6753	10.684	9.54739	6.83781
3	7.39252	7.29535	7.18615	7.06161	6.91711	6.74592	6.53734	6.26517	5.77936	3.89003		1.5	11.0154	10.0558	9.3206	8.38489	7.45903	5.0747
3.5	4.35457	4.297	4.23225	4.15833	4.07245	3.9705	3.84557	3.67636	3.31958	1.63865
4	2.46562	2.43281	2.39588	2.35366	2.30453	2.24606	2.17371	2.06871	1.793	0.25978
4.5	1.55529	1.53448	1.51104	1.48423	1.45298	1.4157	1.36895	1.29508	1.06103	-0.37488
5	1.06537	1.05105	1.03492	1.01645	0.9949	0.96912	0.93627	0.87933	0.67023	-0.69093
